# Supplementary material for: An improved ovine reference genome assembly to facilitate in-depth functional annotation of the sheep genome
Source: PubMed Central journal article supplement (PMC8848310; doi:10.1093/gigascience/giab096), 2022-02-04

# GigaScience

## An improved ovine reference genome assembly to facilitate in depth functional annotation of the sheep genome --Manuscript Draft--

|                                                               |                                                                                                                                                                                                                                                                                                                                                                                                                                                                                                                                                                                                                                                                                                                                                                                                                                                                                                                                                                                                                                                                                                                                                                                                                                                                                                                                                                                                                                                                                                                                                                                                                                                                                                                                                                                                                                                                                                                       |                                                               |                   |                                                               |                       |                                                               |                       |                                                        |                   |                                                     |                       |                                                    |                        |                                                     |                       |
|---------------------------------------------------------------|-----------------------------------------------------------------------------------------------------------------------------------------------------------------------------------------------------------------------------------------------------------------------------------------------------------------------------------------------------------------------------------------------------------------------------------------------------------------------------------------------------------------------------------------------------------------------------------------------------------------------------------------------------------------------------------------------------------------------------------------------------------------------------------------------------------------------------------------------------------------------------------------------------------------------------------------------------------------------------------------------------------------------------------------------------------------------------------------------------------------------------------------------------------------------------------------------------------------------------------------------------------------------------------------------------------------------------------------------------------------------------------------------------------------------------------------------------------------------------------------------------------------------------------------------------------------------------------------------------------------------------------------------------------------------------------------------------------------------------------------------------------------------------------------------------------------------------------------------------------------------------------------------------------------------|---------------------------------------------------------------|-------------------|---------------------------------------------------------------|-----------------------|---------------------------------------------------------------|-----------------------|--------------------------------------------------------|-------------------|-----------------------------------------------------|-----------------------|----------------------------------------------------|------------------------|-----------------------------------------------------|-----------------------|
| <b>Manuscript Number:</b>                                     | GIGA-D-21-00165                                                                                                                                                                                                                                                                                                                                                                                                                                                                                                                                                                                                                                                                                                                                                                                                                                                                                                                                                                                                                                                                                                                                                                                                                                                                                                                                                                                                                                                                                                                                                                                                                                                                                                                                                                                                                                                                                                       |                                                               |                   |                                                               |                       |                                                               |                       |                                                        |                   |                                                     |                       |                                                    |                        |                                                     |                       |
| <b>Full Title:</b>                                            | An improved ovine reference genome assembly to facilitate in depth functional annotation of the sheep genome                                                                                                                                                                                                                                                                                                                                                                                                                                                                                                                                                                                                                                                                                                                                                                                                                                                                                                                                                                                                                                                                                                                                                                                                                                                                                                                                                                                                                                                                                                                                                                                                                                                                                                                                                                                                          |                                                               |                   |                                                               |                       |                                                               |                       |                                                        |                   |                                                     |                       |                                                    |                        |                                                     |                       |
| <b>Article Type:</b>                                          | Data Note                                                                                                                                                                                                                                                                                                                                                                                                                                                                                                                                                                                                                                                                                                                                                                                                                                                                                                                                                                                                                                                                                                                                                                                                                                                                                                                                                                                                                                                                                                                                                                                                                                                                                                                                                                                                                                                                                                             |                                                               |                   |                                                               |                       |                                                               |                       |                                                        |                   |                                                     |                       |                                                    |                        |                                                     |                       |
| <b>Funding Information:</b>                                   | <table border="1"><tr><td>National Institute of Food and Agriculture (2013-67015-21228)</td><td>Dr. Kim C. Worley</td></tr><tr><td>National Institute of Food and Agriculture (2013-67015-21372)</td><td>Dr. Noelle E. Cockett</td></tr><tr><td>National Institute of Food and Agriculture (2017-67016-26301)</td><td>Dr. Brenda M. Murdoch</td></tr><tr><td>International Sheep Genomics Consortium (217201191442)</td><td>Dr. Kim C. Worley</td></tr><tr><td>Agricultural Research Service (5090-31000-026-00-D)</td><td>Dr. Derek M. Bickhart</td></tr><tr><td>Agricultural Research Service (3040-31000-100-00D)</td><td>Dr. Timothy P.L. Smith</td></tr><tr><td>Agricultural Research Service (8042-31000-001-00-D)</td><td>Dr. Benjamin D. Rosen</td></tr></table>                                                                                                                                                                                                                                                                                                                                                                                                                                                                                                                                                                                                                                                                                                                                                                                                                                                                                                                                                                                                                                                                                                                                              | National Institute of Food and Agriculture (2013-67015-21228) | Dr. Kim C. Worley | National Institute of Food and Agriculture (2013-67015-21372) | Dr. Noelle E. Cockett | National Institute of Food and Agriculture (2017-67016-26301) | Dr. Brenda M. Murdoch | International Sheep Genomics Consortium (217201191442) | Dr. Kim C. Worley | Agricultural Research Service (5090-31000-026-00-D) | Dr. Derek M. Bickhart | Agricultural Research Service (3040-31000-100-00D) | Dr. Timothy P.L. Smith | Agricultural Research Service (8042-31000-001-00-D) | Dr. Benjamin D. Rosen |
| National Institute of Food and Agriculture (2013-67015-21228) | Dr. Kim C. Worley                                                                                                                                                                                                                                                                                                                                                                                                                                                                                                                                                                                                                                                                                                                                                                                                                                                                                                                                                                                                                                                                                                                                                                                                                                                                                                                                                                                                                                                                                                                                                                                                                                                                                                                                                                                                                                                                                                     |                                                               |                   |                                                               |                       |                                                               |                       |                                                        |                   |                                                     |                       |                                                    |                        |                                                     |                       |
| National Institute of Food and Agriculture (2013-67015-21372) | Dr. Noelle E. Cockett                                                                                                                                                                                                                                                                                                                                                                                                                                                                                                                                                                                                                                                                                                                                                                                                                                                                                                                                                                                                                                                                                                                                                                                                                                                                                                                                                                                                                                                                                                                                                                                                                                                                                                                                                                                                                                                                                                 |                                                               |                   |                                                               |                       |                                                               |                       |                                                        |                   |                                                     |                       |                                                    |                        |                                                     |                       |
| National Institute of Food and Agriculture (2017-67016-26301) | Dr. Brenda M. Murdoch                                                                                                                                                                                                                                                                                                                                                                                                                                                                                                                                                                                                                                                                                                                                                                                                                                                                                                                                                                                                                                                                                                                                                                                                                                                                                                                                                                                                                                                                                                                                                                                                                                                                                                                                                                                                                                                                                                 |                                                               |                   |                                                               |                       |                                                               |                       |                                                        |                   |                                                     |                       |                                                    |                        |                                                     |                       |
| International Sheep Genomics Consortium (217201191442)        | Dr. Kim C. Worley                                                                                                                                                                                                                                                                                                                                                                                                                                                                                                                                                                                                                                                                                                                                                                                                                                                                                                                                                                                                                                                                                                                                                                                                                                                                                                                                                                                                                                                                                                                                                                                                                                                                                                                                                                                                                                                                                                     |                                                               |                   |                                                               |                       |                                                               |                       |                                                        |                   |                                                     |                       |                                                    |                        |                                                     |                       |
| Agricultural Research Service (5090-31000-026-00-D)           | Dr. Derek M. Bickhart                                                                                                                                                                                                                                                                                                                                                                                                                                                                                                                                                                                                                                                                                                                                                                                                                                                                                                                                                                                                                                                                                                                                                                                                                                                                                                                                                                                                                                                                                                                                                                                                                                                                                                                                                                                                                                                                                                 |                                                               |                   |                                                               |                       |                                                               |                       |                                                        |                   |                                                     |                       |                                                    |                        |                                                     |                       |
| Agricultural Research Service (3040-31000-100-00D)            | Dr. Timothy P.L. Smith                                                                                                                                                                                                                                                                                                                                                                                                                                                                                                                                                                                                                                                                                                                                                                                                                                                                                                                                                                                                                                                                                                                                                                                                                                                                                                                                                                                                                                                                                                                                                                                                                                                                                                                                                                                                                                                                                                |                                                               |                   |                                                               |                       |                                                               |                       |                                                        |                   |                                                     |                       |                                                    |                        |                                                     |                       |
| Agricultural Research Service (8042-31000-001-00-D)           | Dr. Benjamin D. Rosen                                                                                                                                                                                                                                                                                                                                                                                                                                                                                                                                                                                                                                                                                                                                                                                                                                                                                                                                                                                                                                                                                                                                                                                                                                                                                                                                                                                                                                                                                                                                                                                                                                                                                                                                                                                                                                                                                                 |                                                               |                   |                                                               |                       |                                                               |                       |                                                        |                   |                                                     |                       |                                                    |                        |                                                     |                       |
| <b>Abstract:</b>                                              | <p><b>Background</b></p> <p>The domestic sheep ( <i>Ovis aries</i> ) is an important agricultural species raised for meat, wool, and milk across the world. A high-quality reference genome for this species enhances the ability to discover genetic mechanisms influencing biological traits. Further, a high-quality reference genome allows for precise functional annotation of gene regulatory elements. The rapid advances in genome assembly algorithms and emergence of increasingly long sequence read length provide the opportunity for an improved <i>de novo</i> assembly of the sheep reference genome.</p> <p><b>Findings</b></p> <p>Short-read Illumina (55x coverage), long-read PacBio (75x coverage), and Hi-C data from this ewe retrieved from public databases were combined with an additional 50x coverage of Oxford Nanopore data and assembled with canu v1.9. The assembled contigs were scaffolded using Hi-C data with Salsa v2.2, gaps filled with PBSuitev15.8.24, and polished with Nanopolish v0.12.5. After duplicate contig removal with PurgeDups v1.0.1, chromosomes were oriented and polished with two rounds of a pipeline which consisted of freebayes v1.3.1 to call variants, Merfin to validate them, and BCFtools to generate the consensus fasta. The ARS-UI_Ramb_v2.0 assembly has improved continuity (contig N50 of 43.18 Mb) with a 19-fold and 38-fold decrease in the number of scaffolds compared with Oar_rambouillet_v1.0 and Oar_v4.0. ARS-UI_Ramb_v2.0 has greater per-base accuracy and fewer insertions and deletions identified from mapped RNA sequence than previous assemblies.</p> <p><b>Conclusions</b></p> <p>The ARS-UI_Ramb_v2.0 assembly is a substantial improvement that will optimize the functional annotation of the sheep genome and facilitate improved mapping accuracy of genetic variant and expression data for traits in sheep.</p> |                                                               |                   |                                                               |                       |                                                               |                       |                                                        |                   |                                                     |                       |                                                    |                        |                                                     |                       |
| <b>Corresponding Author:</b>                                  | Benjamin D Rosen<br><br>UNITED STATES                                                                                                                                                                                                                                                                                                                                                                                                                                                                                                                                                                                                                                                                                                                                                                                                                                                                                                                                                                                                                                                                                                                                                                                                                                                                                                                                                                                                                                                                                                                                                                                                                                                                                                                                                                                                                                                                                 |                                                               |                   |                                                               |                       |                                                               |                       |                                                        |                   |                                                     |                       |                                                    |                        |                                                     |                       |
| <b>Corresponding Author Secondary Information:</b>            |                                                                                                                                                                                                                                                                                                                                                                                                                                                                                                                                                                                                                                                                                                                                                                                                                                                                                                                                                                                                                                                                                                                                                                                                                                                                                                                                                                                                                                                                                                                                                                                                                                                                                                                                                                                                                                                                                                                       |                                                               |                   |                                                               |                       |                                                               |                       |                                                        |                   |                                                     |                       |                                                    |                        |                                                     |                       |

|                                                                                                                                                                                                                                                                                                                                                                                   |                            |
|-----------------------------------------------------------------------------------------------------------------------------------------------------------------------------------------------------------------------------------------------------------------------------------------------------------------------------------------------------------------------------------|----------------------------|
| <b>Corresponding Author's Institution:</b>                                                                                                                                                                                                                                                                                                                                        |                            |
| <b>Corresponding Author's Secondary Institution:</b>                                                                                                                                                                                                                                                                                                                              |                            |
| <b>First Author:</b>                                                                                                                                                                                                                                                                                                                                                              | Kimberly M Davenport, M.S. |
| <b>First Author Secondary Information:</b>                                                                                                                                                                                                                                                                                                                                        |                            |
| <b>Order of Authors:</b>                                                                                                                                                                                                                                                                                                                                                          | Kimberly M Davenport, M.S. |
|                                                                                                                                                                                                                                                                                                                                                                                   | Derek M. Bickhart          |
|                                                                                                                                                                                                                                                                                                                                                                                   | Kim C. Worley              |
|                                                                                                                                                                                                                                                                                                                                                                                   | Shwetha C. Murali          |
|                                                                                                                                                                                                                                                                                                                                                                                   | Mazdak Salavati            |
|                                                                                                                                                                                                                                                                                                                                                                                   | Emily L. Clark             |
|                                                                                                                                                                                                                                                                                                                                                                                   | Noelle E. Cockett          |
|                                                                                                                                                                                                                                                                                                                                                                                   | Michael P. Heaton          |
|                                                                                                                                                                                                                                                                                                                                                                                   | Timothy P.L. Smith         |
|                                                                                                                                                                                                                                                                                                                                                                                   | Brenda M. Murdoch          |
| Benjamin D. Rosen                                                                                                                                                                                                                                                                                                                                                                 |                            |
| <b>Order of Authors Secondary Information:</b>                                                                                                                                                                                                                                                                                                                                    |                            |
| <b>Additional Information:</b>                                                                                                                                                                                                                                                                                                                                                    |                            |
| <b>Question</b>                                                                                                                                                                                                                                                                                                                                                                   | <b>Response</b>            |
| Are you submitting this manuscript to a special series or article collection?                                                                                                                                                                                                                                                                                                     | No                         |
| <b>Experimental design and statistics</b>                                                                                                                                                                                                                                                                                                                                         | Yes                        |
| <p>Full details of the experimental design and statistical methods used should be given in the Methods section, as detailed in our <a href="#">Minimum Standards Reporting Checklist</a>. Information essential to interpreting the data presented should be made available in the figure legends.</p> <p>Have you included all the information requested in your manuscript?</p> |                            |
| <b>Resources</b>                                                                                                                                                                                                                                                                                                                                                                  | Yes                        |
| A description of all resources used, including antibodies, cell lines, animals and software tools, with enough information to allow them to be uniquely identified, should be included in the Methods section. Authors are strongly                                                                                                                                               |                            |

|                                                                                                                                                                                                                                                                                                                                                                                                                                                                                                                                                         |            |
|---------------------------------------------------------------------------------------------------------------------------------------------------------------------------------------------------------------------------------------------------------------------------------------------------------------------------------------------------------------------------------------------------------------------------------------------------------------------------------------------------------------------------------------------------------|------------|
| <p>encouraged to cite <a href="#">Research Resource Identifiers</a> (RRIDs) for antibodies, model organisms and tools, where possible.</p> <p>Have you included the information requested as detailed in our <a href="#">Minimum Standards Reporting Checklist</a>?</p>                                                                                                                                                                                                                                                                                 |            |
| <p><b>Availability of data and materials</b></p> <p>All datasets and code on which the conclusions of the paper rely must be either included in your submission or deposited in <a href="#">publicly available repositories</a> (where available and ethically appropriate), referencing such data using a unique identifier in the references and in the “Availability of Data and Materials” section of your manuscript.</p> <p>Have you have met the above requirement as detailed in our <a href="#">Minimum Standards Reporting Checklist</a>?</p> | <p>Yes</p> |

1 **An improved ovine reference genome assembly to facilitate in depth functional annotation**  
2 **of the sheep genome**

3  
4 Kimberly M. Davenport<sup>1</sup>, Derek M. Bickhart<sup>2</sup>, Kim Worley<sup>3</sup>, Shwetha C. Murali<sup>4</sup>, Mazdak  
5 Salavati<sup>5</sup>, Emily L. Clark<sup>6</sup>, Noelle E. Cockett<sup>7</sup>, Michael P. Heaton<sup>8</sup>, Timothy P.L. Smith<sup>9</sup>, Brenda  
6 M. Murdoch<sup>10\*</sup>, and Benjamin D. Rosen<sup>11\*</sup>

7  
8 <sup>1</sup>Department of Animal, Veterinary, and Food Sciences, University of Idaho, 875 Perimeter Dr.,  
9 Moscow, ID, United States 83843. Email: [kmdavenport@uidaho.edu](mailto:kmdavenport@uidaho.edu)

10  
11 <sup>2</sup>US Dairy Forage Research Center, USDA-ARS, 1925 Linden Drive, Madison, WI, United  
12 States 53706. Email: [derek.bickhart@usda.gov](mailto:derek.bickhart@usda.gov)

13  
14 <sup>3</sup>Baylor College of Medicine, One Baylor Plaza, Houston, TX, United States 77030. Email:  
15 [kworley@bcm.edu](mailto:kworley@bcm.edu)

16  
17 <sup>4</sup>Baylor College of Medicine, One Baylor Plaza, Houston, TX, United States 77030.  
18 Email: [shwethac@gmail.com](mailto:shwethac@gmail.com)

19  
20 <sup>5</sup>The Roslin Institute, Royal (Dick) School of Veterinary Studies, The University of Edinburgh,  
21 Easter Bush Campus, Midlothian, United Kingdom, EH25 9RG, United Kingdom. Email:  
22 [mazdak.salavati@roslin.ed.ac.uk](mailto:mazdak.salavati@roslin.ed.ac.uk)

23  
24 <sup>6</sup>The Roslin Institute, Royal (Dick) School of Veterinary Studies, The University of Edinburgh,  
25 Easter Bush Campus, Midlothian, United Kingdom, EH25 9RG. Email:  
26 [emily.clark@roslin.ed.ac.uk](mailto:emily.clark@roslin.ed.ac.uk)

27  
28 <sup>7</sup>Utah State University, Old Main Hill, Logan, UT 84322. Email: [noelle.cockett@usu.edu](mailto:noelle.cockett@usu.edu)

29  
30 <sup>8</sup>US Meat Animal Research Center, USDA-ARS, State Spur 18D, Clay Center, NE 68933.  
31 Email: [mike.heaton@usda.gov](mailto:mike.heaton@usda.gov)

32  
33 <sup>9</sup>US Meat Animal Research Center, USDA-ARS, State Spur 18D, Clay Center, NE 68933.  
34 Email: [tim.smith2@usda.gov](mailto:tim.smith2@usda.gov)

35  
36 <sup>10</sup>Department of Animal, Veterinary, and Food Sciences, University of Idaho, 875 Perimeter Dr.,  
37 Moscow, ID 83843. Email: [bmurdoch@uidaho.edu](mailto:bmurdoch@uidaho.edu)

38  
39 <sup>11</sup>Animal Genomics and Improvement Laboratory, USDA-ARS, 10300 Baltimore Avenue,  
40 Beltsville, MD 20705. Email: [ben.rosen@usda.gov](mailto:ben.rosen@usda.gov)

41  
42 Correspondence:

43 Brenda M. Murdoch

44 [bmurdoch@uidaho.edu](mailto:bmurdoch@uidaho.edu)

45 Benjamin D. Rosen

46 [ben.rosen@usda.gov](mailto:ben.rosen@usda.gov)

47 **Abstract**

48

49 *Background*

50

51 The domestic sheep (*Ovis aries*) is an important agricultural species raised for meat, wool, and  
52 milk across the world. A high-quality reference genome for this species enhances the ability to  
53 discover genetic mechanisms influencing biological traits. Further, a high-quality reference  
54 genome allows for precise functional annotation of gene regulatory elements. The rapid advances  
55 in genome assembly algorithms and emergence of increasingly long sequence read length  
56 provide the opportunity for an improved *de novo* assembly of the sheep reference genome.

57

58

59 *Findings*

60

61 Short-read Illumina (55x coverage), long-read PacBio (75x coverage), and Hi-C data from this  
62 ewe retrieved from public databases were combined with an additional 50x coverage of Oxford  
63 Nanopore data and assembled with canu v1.9. The assembled contigs were scaffolded using Hi-  
64 C data with Salsa v2.2, gaps filled with Pbsuite v15.8.24, and polished with Nanopolish v0.12.5.  
65 After duplicate contig removal with PurgeDups v1.0.1, chromosomes were oriented and polished  
66 with two rounds of a pipeline which consisted of freebayes v1.3.1 to call variants, Merfin to  
67 validate them, and BCFtools to generate the consensus fasta. The ARS-UI\_Ramb\_v2.0 assembly  
68 has improved continuity (contig N50 of 43.18 Mb) with a 19-fold and 38-fold decrease in the  
69 number of scaffolds compared with Oar\_rambouillet\_v1.0 and Oar\_v4.0. ARS-UI\_Ramb\_v2.0

70 has greater per-base accuracy and fewer insertions and deletions identified from mapped RNA  
71 sequence than previous assemblies.

72

73

74 *Conclusions*

75

76 The ARS-UI\_Ramb\_v2.0 assembly is a substantial improvement that will optimize the  
77 functional annotation of the sheep genome and facilitate improved mapping accuracy of genetic  
78 variant and expression data for traits in sheep.

79

80

81 **Keywords:** Rambouillet, genome assembly, reference genome, sheep

82

83

84

85

86

87

88

89

90

91

92

## 93 **Context**

94

95 The domestic sheep (*Ovis aries*) is a globally important livestock species raised for a variety of  
96 purposes including meat, wool, and milk. Domestication likely occurred in multiple events  
97 approximately 11,000 years ago [1-4]. Selection for desirable traits including meat, wool, and  
98 milk began approximately 4,000-5,000 years ago [2,4]. Modern sheep breeds exhibit a wide  
99 variety of phenotypes and adaptations to specific environments, for example the enhanced  
100 parasite tolerance evident in hair sheep [5,6]. As many as 1,400 breeds of sheep exist today [7-9]  
101 including the Rambouillet breed developed in France from a Merino fine wool lineage that is  
102 regarded for its ability to produce high quality wool as well as meat products in production  
103 systems across the world [10,11].

104

105 Genome research in sheep holds promise to improve efficiency and sustainability of production  
106 and reduce the environmental effects of animal agriculture [12]. The first sheep reference  
107 genome assembly was based on whole genome shotgun (WGS) short-read sequencing,  
108 scaffolded by genetic linkage and radiation hybrid maps. The sequence came from two unrelated  
109 Texel breed sheep, with the first assembly draft (Oar\_v3.1; International Sheep Genomics  
110 Consortium, 2010) having a contig N50 of 40 kilobases (kb) and the update (Oar\_v4.0) [13]  
111 boosting the N50 metric to 150 kb. More recently, the Ovine Functional Annotation of Animal  
112 Genomes (FAANG) project proposed to perform a variety of genome annotation assays for  
113 dozens of tissues from a single animal [14,15]. To maximize the success of assays that depend on  
114 mapping sequence data to a reference, the FAANG project assembled the genome of that animal,  
115 a female of the Rambouillet breed. The assembly, released in 2017 (Oar\_rambouillet\_v1.0,

116 GenBank accession GCF\_002742125; Worley et al., unpublished) is based on a combination of  
117 Pacific Biosciences RSII WGS long-read and Illumina short-read sequencing. It has an improved  
118 contig N50 of 2.6 megabases (Mb) and is generally regarded as the official reference assembly  
119 for global sheep research.

120

121 The continued maturation of long read sequencing technologies provided an opportunity to  
122 improve upon the sheep reference genome assembly. Since most of the proposed FAANG  
123 annotation assays had already been performed on the Rambouillet ewe, lung tissue from the  
124 same animal was chosen for DNA extraction. This allowed the use of existing long read data to  
125 supplement new, longer-read, Oxford Nanopore PromethION sequencing. We report a *de novo*  
126 assembly of the same Rambouillet ewe used for Oar\_rambouillet\_v1.0, based on approximately  
127 50x coverage of nanopore reads (N50 47kb) and 75x coverage PacBio reads (N50 13kb). The  
128 new assembly, ARS-UI\_Ramb\_v2.0 offers a 20-fold improvement in contiguity and increased  
129 accuracy, providing a basis for regulatory element annotation in the FAANG project and  
130 facilitating the discovery of biological mechanisms that influence traits important in global sheep  
131 research and production.

132

133

## 134 **Methods**

135

### 136 *Sampling Strategy*

137



138 The fullblood Rambouillet ewe used for this genome assembly (Benz 2616, USMARC ID  
139 200935900) (Figure 1) was selected by the Ovine Functional Annotation of Animal Genomes  
140 project and acquired from the USDA. Tissues were collected postmortem from the healthy six-  
141 year-old ewe as approved by the Utah State University Institutional Animal Care and Use  
142 Committee. A full description of the tissue collection strategy is available in the FAANG Data  
143 Coordination Center [15,16]. Details regarding the tissues collected from the animal are available  
144 under BioSample number SAMEG329607 [17].

145

146

#### 147 *Sequencing and Data Acquisition*

148

149 DNA was extracted from approximately 50 mg of lung tissue using phenol:chloroform-based  
150 method as described (Logsdon 2019). Briefly, the frozen tissue was pulverized in a cryoPREP  
151 CP02 tissue disruption system (Covaris Inc., Woburn MA) as recommended by the  
152 manufacturer. The powdered tissue was transferred to a 50 mL conical tube and mixed in 200  
153  $\mu$ L of phosphate buffered saline (Sigma-Aldrich, St. Louis MO). The tissue was then diluted in  
154 10 mL of buffer TLB (100mM NaCl, 10mM Tris-HCl pH 8.0, 25 mM EDTA, 0.5% SDS) and  
155 mixed by vortexing, then incubated with 20  $\mu$ L 10 mg/mL RNase A at 37°C for one hour with  
156 gentle shaking. Protein digestion was performed with 100  $\mu$ L Proteinase K (20 mg/mL) at 50°C  
157 for 2 hours, with slow rotation of the tube to mix every 30 minutes. The lysate was distributed  
158 equally into two 15 mL Phase Lock tubes (Quantabio, Beverly MA) and each tube received 5  
159 mL of TE-saturated Phenol (Sigma-Aldrich, St. Louis MO) followed by mixing on a tube rotator  
160 at 20 RPM for 10 minutes at 22°C. The aqueous layer was collected after separating at 2300xg

161 for 10 minutes and transferred to another Phase Lock tube. A second extraction performed in the  
162 same way as the first was conducted using 2.5 mL phenol and 2.5 mL chloroform:isoamyl  
163 alcohol (Sigma). The final aqueous phase was transferred to a 50 mL conical tube and the DNA  
164 precipitated with 2 mL of 5M ammonium acetate and 15 mL of ice-cold 100% ethanol. The  
165 DNA was pulled from the alcohol using a Pasteur pipet “hook” and placed in 10 mL of cold 70%  
166 ethanol to wash the pellet. The ethanol was poured off and the DNA pellet dried for 20-30  
167 minutes, then dissolved in a dark drawer at room temperature for 48 hours in 1 mL of 10mM  
168 Tris-Cl pH 8.5. Library preparation for Oxford Nanopore long read sequencing was performed  
169 with an LSK-109 template preparation kit as recommended by the manufacturer (Oxford  
170 Nanopore, Oxford U.K.) with modifications as described by Logsdon  
171 ([https://www.protocols.io/view/hmw-gdna-purification-and-ont-ultra-long-read-data-  
172 bchhit36?comment\\_id=88927](https://www.protocols.io/view/hmw-gdna-purification-and-ont-ultra-long-read-data-bchhit36?comment_id=88927)). The ligated template was sequenced with a PromethION  
173 instrument using four R9.4 flow cells. (Oxford Nanopore Technologies, Oxford, United  
174 Kingdom). Output as fast5 files were basecalled with Guppy v3.1 [18].

175  
176 Sequence data used in the previous Oar\_rambouillet\_v1.0 assembly was retrieved from the  
177 Sequence Read Archive listed under project number PRJNA414087 [15]. PacBio RS II sequence  
178 generated from DNA extracted from whole blood was retrieved from SRX3445660,  
179 SRX3445661, SRX3445662, and SRX3445663. The Hi-C sequence data generated from liver  
180 using HindIII enzyme and sequenced at 150 bp paired end with an Illumina HiSeq X Ten was  
181 retrieved from SRX3399085 and SRX3399086. Short read whole genome sequencing from DNA  
182 extracted from whole blood collected from the Rambouillet ewe was performed with an Illumina  
183 HiSeq X Ten sequenced at 150 bp paired end and was retrieved from SRX3405602. Further

184 details about these sequences can be found under the umbrella project number PRJNA414087.  
185 Short read 45 bp paired end whole genome sequence from an Illumina Genome Analyzer II  
186 generated from Texel sheep used in previous genome assemblies were retrieved from the  
187 Sequence Read Archive under accessions SRX511533-SRX511565 (BioProject PRJNA169880).

188

189

### 190 *Assembly*

191

192 Contigs were assembled with Oxford Nanopore and PacBio reads generated as described above  
193 using canu v1.8 through the trimmed reads stage of assembly. Parameters for contig construction  
194 were set as “batOptions=-dg 4 -db 4 -mo 1000” [19]. Canu v1.9 was used to complete the contig  
195 assembly because this update demonstrates better consensus generation of the overlapped contigs  
196 in the final step in the assembly process [20,21]. The corrected error rate option was set as  
197 “correctedErrorRate=0.105.”

198

199

### 200 *Scaffolding*

201

202 Two Hi-C datasets from liver tissue from two different library preparations were retrieved as  
203 described above. The Hi-C reads were first aligned to the polished contigs using the Arima  
204 Genomics mapping pipeline [22]. This pipeline first maps paired end reads individually with  
205 bwa-mem, then removes the 3’ end of reads identified as chimeric and span ligation junctions.  
206 Reads were then paired, filtered by mapping quality with samtools [23], and PCR duplicates

207 removed with Picard [24]. The two Hi-C libraries were merged in the final step in the Arima  
208 pipeline to generate the merged BAM file. The BAM file was converted to a BED file for input  
209 into Salsa using the bedtools command `bamToBed` [25]. Salsa v2.2 was used for scaffolding by  
210 implementing “python run\_pipeline.py -a contigs.fasta -l contigs.fasta.fai -b alignment.bed -e  
211 HindIII -o scaffolds -m yes” [26].

212  
213 The Hi-C reads were aligned to the scaffolded assembly with the Arima Genomics mapping  
214 pipeline and then processed with PretextView to visually evaluate the scaffolds as a contact map  
215 in PretextView [27]. The scaffolded assembly was also compared to *Oar\_rambouillet\_v1.0* by  
216 aligning the two genomes with “minimap2 -cx asm5 Oar\_rambouillet\_v1.0\_genomic.fasta  
217 scaffolds.fasta > alignment.paf” [28]. A dotplot of the alignment was visualized with D-Genies  
218 [29]. Scaffolds were edited based on visual inspection of the contact map and dotplot, as well as  
219 the Hi-C alignment file. Scaffold joins and rearrangements were incorporated to the assembly  
220 using the *agp2fasta* mode of CombineFasta [30].

221

222

### 223 *Gap Filling and Polishing*

224

225 Gap filling was completed with pbsuite v15.8.24 using both the PacBio and Oxford Nanopore  
226 reads. Nanopolish v0.12.5 [31] with the NanoGrid parallel wrapper [32] was employed with the  
227 raw fast5 files generated from the PromethION sequencing to polish the assembly. Duplicates  
228 were removed using PurgeDups v1.0.1 [33]. The chromosome orientation was confirmed in the  
229 polished assembly by identifying telomeres and centromeres using RepeatMasker v4.1.1 [34].

230 The mitochondrial genome was identified by aligning the previously annotated mitochondrial  
231 sequence from Oar\_rambouillet\_v1.0 (RefSeq NC\_001941.1) to the assembly contigs.  
232 Chromosomes were oriented centromere to telomere and placed in chromosome number order.  
233 The final polishing was performed with two rounds of freebayes v1.3.1 using the Illumina short  
234 read data after final chromosome orientations and mitochondrial genome were confirmed [35].  
235 Variants used for polishing with both Nanopolish and freebayes were screened with Merfin [36]  
236 which evaluates the k-mer consequences of variant calls and filters unsupported variants.

237

238

### 239 *RNA Sequencing*

240

241 RNA sequencing data was generated from five tissues including skin, thalamus, pituitary, lymph  
242 node (mesenteric), and abomasum pylorus collected from the animal used to assemble the  
243 reference genome. Details regarding the RNA isolation protocol, library preparation, and  
244 sequencing as well as the raw data can be found in GenBank under BioProject PRJEB35292,  
245 specifically under SRA run numbers ERR3665717 (skin), ERR3728435 (thalamus),  
246 ERR3650379 (pituitary), ERR3665711 (lymph node mesenteric), and ERR3650373 (abomasum  
247 pylorus). Reads were trimmed with Trim Galore v0.6.4 [37] and alignment to both Rambouillet  
248 genomes was performed with STAR v2.7 using default parameters [38]. Indels were identified  
249 with bcftools mpileup, filtering allele depth (AD) at  $> 5$  [39].

250

251

### 252 *Annotation*

253 The annotation for ARS-UI\_Ramb\_v2.0, NCBI Ovis aries Annotation Release 104, is available  
254 in RefSeq and other NCBI genome resources  
255 ([https://ftp.ncbi.nlm.nih.gov/genomes/all/annotation\\_releases/9940/104](https://ftp.ncbi.nlm.nih.gov/genomes/all/annotation_releases/9940/104)).

256  
257 Here we also provide a liftover of the annotation for Oar\_rambouillet\_v1.0 onto ARS-  
258 UI\_Ramb\_v2.0. The annotation used for the liftover was NCBI v103  
259 GCF\_002742125.1\_Oar\_rambouillet\_v1.0\_genomic.fna.gz. The GFF3 format gene annotation  
260 file was prepared for processing using liftOff v1.5.2 [40]. A set of matching chromosome names  
261 for Oar\_rambouillet\_v1.0 and ARS-UI\_Ramb\_v2.0 were generated according to the instructions  
262 for liftOff (*paste -d "," <(cut -d ' ' -f1 ramb1.chr) <(cut -d ' ' -f1 ramb2.chr) > chroms.txt*). The  
263 GFF file (annotation Ramb1LO2) generated by liftOff is included in Supplementary File 1  
264 (Ramb\_v1.0\_NCBI103\_lifted\_over\_ARS-UI\_Ramb\_v2.0.gff.gz).

265  
266 To compare the breakdown of transcripts captured by the three annotations  
267 (Oar\_Rambouillet\_v1.0, Ramb1LO2 (liftover) and ARS-UI\_Ramb\_v2.0), we generated  
268 transcript expression estimates using Kallisto v0.44.0 [41]. For the lifted over gene annotation  
269 the GFF file (Ramb\_v1.0\_NCBI103\_lifted\_over\_ARS-UI\_Ramb\_v2.0.gff.gz) was used to  
270 generate transcriptome sequence FASTA files, as a Kallisto index, for transcript expression  
271 estimation. Briefly, exonic blocks were extracted from the GFF3 file using the awk command  
272 (*awk '(\$3~/exon/)' input.gff*). The getfasta and groupby plugins from bedtools v2.30.0 [42] were  
273 used to extract the exonic sequences and group them by transcript name. Exonic sequences for  
274 each transcript were appended in the correct order, to produce the complete sequence for each  
275 transcript. The FASTA format file for the whole transcriptome was created using all of the

276 transcript level FASTA sequences for the liftover annotation Ramb1LO2 (Supplementary File 2;  
277 Ramb1LO2\_NCBI103\_geneBank\_rna.fa). The set of scripts used for this step are included in  
278 Supplementary File 3. The Kallisto indices for Oar\_Rambouillet\_v1.0  
279 (GCF\_002742125.1\_Oar\_rambouillet\_v1.0\_rna.fna.gz), Ramb1LO2 (liftover;  
280 Ramb1LO2\_NCBI103\_geneBank\_rna.fa) and ARS-UI\_Ramb\_v2.0 (GCF\_016772045.1\_ARS-  
281 UI\_Ramb\_v2.0\_rna.fna.gz) were then used with the RNA-Seq data from the 61 tissues from  
282 Benz2616 (GenBank BioProject PRJNA414087 and PRJEB35292) to estimate transcript level  
283 expression for every tissue as transcript per million mapped reads (TPM) and compared across  
284 the three annotations.

285

286

## 287 **Data Validation and Quality Control**

288

### 289 *Assembly Quality Statistics*

290

291 The four flow cells of PromethION data produced 136 gigabases (Gb) of WGS sequence  
292 (approximately 51x coverage) in reads having a read N50 of 47 kb. The initial generation of  
293 contigs used this data as well as 198.1 Gb of RSII data with a read N50 of 12.9 kb. The ARS-  
294 UI\_Ramb\_v2.0 assembly was submitted to NCBI GenBank under accession number  
295 GCA\_016772045.1, and statistics of contigs and scaffolds following initial polishing, scaffolding  
296 with Hi-C data and manual editing, gap-filling, and final polishing, are shown in Table 1. The  
297 assembly improved on the Oar\_v4.0/Oar\_rambouillet\_v1.0 sheep reference assemblies in all  
298 continuity measures (Table 1) including a 286/17-fold increase in contig N50 (the size of the

299 shortest contig for which all larger contigs contain half of the total assembly), a 214/33-fold  
300 reduction in the number of contigs in the assembly and concomitant 209/13-fold reduction of  
301 contig L50 (the number of contigs making up half of the total assembly), and 38/19-fold  
302 reduction in total number of scaffolds. Manual curation of scaffolds using Hi-C data improved  
303 scaffold continuity and led to chromosome length scaffolds (Figure 2).

304  
305 The Themis-ASM pipeline [43] was implemented to further assess assembly quality and  
306 compare sheep genome assemblies. Short read sequence from both the Rambouillet ewe used in  
307 this assembly and Texel sheep from previous sheep genome assemblies were used to compare  
308 ARS-UI\_Ramb\_v2.0 with Oar\_rambouillet\_v1.0 and Oar\_v4.0 assemblies.

309  
310 The k-mer based quality value and error rates improved with ARS-UI\_Ramb\_v2.0 compared  
311 with Oar\_rambouillet\_v1.0 and Oar\_v4.0. This is also reflected in the proportion of complete  
312 assembly based on k-mers (merCompleteness), which is similar between ARS-UI\_Ramb\_v2.0  
313 and Oar\_rambouillet\_v1.0 and both are higher than Oar\_v4.0. Further, the SNP and indel quality  
314 value (baseQV) were greatest overall in ARS-UI\_Ramb\_v2.0 (41.84), followed by  
315 Oar\_rambouillet\_v1.0 (40.69) and Oar\_v4.0 (32.40). The percentage of short reads not mapped  
316 to the genome was  $\leq 1\%$  in all three assemblies.

317  
318 The completeness of ARS-UI\_Ramb\_v2.0 was evaluated by examining the presence or absence  
319 of evolutionarily conserved genes in each assembly using Benchmarking Universal Single-Copy  
320 Ortholog (BUSCO) scores generated as an output of the Themis-ASM pipeline. The percent of  
321 single copy complete BUSCOs were higher (90.7%) in ARS-UI\_Ramb\_v2.0 when compared



322 with Oar\_rambouillet\_v1.0 (90.1%) and Oar\_v4.0 (86.1%). Complete duplicated BUSCO  
323 percentage was highest in Oar\_rambouillet\_v1.0 (1.6%) compared with ARS-UI\_Ramb\_v2.0  
324 (1.4%), and lowest in Oar\_v4.0 (1.0%). Further, ARS-UI\_Ramb\_v2.0 had the lowest percent of  
325 fragmented and missing BUSCOs (2.0% and 5.9%, respectively) compared with  
326 Oar\_rambouillet\_v1.0 (2.1% and 6.2%, respectively) and Oar\_v4.0 (3.7% and 9.2%,  
327 respectively).

328  
329 The three sheep genome assemblies were also compared with a feature response curve in which  
330 the quality of the assembly is analyzed as a function of the features, or maximum number of  
331 possible errors, allowed in the contigs (Figure 3) [44]. Both the ARS-UI\_Ramb\_v2.0 and  
332 Oar\_v4.0 feature response curves peak higher and to the left of Oar\_rambouillet\_v1.0, which  
333 indicate fewer errors in these assemblies (Figure 3A). The ARS-UI\_Ramb\_v2.0 genome also has  
334 fewer regions with either low or high coverage overall and for paired reads, suggesting fewer  
335 coverage issues, as well as fewer improperly paired or unmapped single reads when compared  
336 with other assemblies (Figure 3B). The number of high Comp/Expansion (CE) statistics in ARS-  
337 UI\_Ramb\_v2.0 was intermediate between Oar\_rambouillet\_v1.0 (higher) and Oar\_v4.0 (lower),  
338 however this latest assembly had the lowest number of regions with low CE statistics.

339  
340 Comparative alignment of ARS-UI\_Ramb\_v2.0 with previous assemblies Oar\_rambouillet\_v1.0  
341 and Oar\_v4.0 and visualization with a dotplot revealed a high amount of agreement between  
342 assemblies (Figure 4). Interestingly, chromosome 11 was improperly oriented in  
343 Oar\_rambouillet\_v1.0, and after confirming centromere and telomere locations on this  
344 chromosome, this was resolved in the ARS-UI\_Ramb\_v2.0 assembly. The percent identity

345 between ARS-UI\_Ramb\_v2.0 is very high when compared with Oar\_rambouillet\_v1.0 which  
346 was expected considering the same animal was used in both assemblies. However, Oar\_v4.0 was  
347 assembled from Texel sheep, which is apparent in the percent identity in the dotplot.

348

349 In summary, ARS-UI\_Ramb\_v2.0 offers greater contiguity, improved quality, more complete  
350 BUSCOs, and fewer assembly errors when compared with previous assemblies.

351

352

### 353 *RNA sequencing alignment*

354

355 Insertions and deletions (indels) in the ARS-UI\_Ramb\_v2.0 assembly were characterized and  
356 compared with Oar\_rambouillet\_v1.0 by mapping 150 bp paired-end RNA-seq data from skin,  
357 thalamus, pituitary, lymph node (mesenteric), and abomasum pylorus generated from the same  
358 animal used to assemble the reference genome. In all five tissues, ARS-UI\_Ramb\_v2.0 had  
359 nearly half of the number of indels compared with Oar\_rambouillet\_v1.0. Most indels identified  
360 in both assemblies were 1bp in length. The ARS-UI\_Ramb\_v2.0 had a greater number of  
361 uniquely mapped reads in each tissue when compared with Oar\_rambouillet\_v1.0, leading to an  
362 approximate 2% increase in the percent of uniquely mapped reads in most tissues except  
363 pituitary, which saw an almost 13% improvement. The number of reads that mapped to multiple  
364 loci decreased in the new assembly by 12.59% in pituitary, and 1-2% in other tissues. Further,  
365 ARS-UI\_Ramb\_v2.0 had fewer unmapped reads than Oar\_rambouillet\_v1.0 across all five  
366 tissues by an average of 0.15%.

367

368 *Annotation*

369

370 The ARS-UI\_Ramb\_v2.0 annotation represents a substantial improvement over the annotation  
371 on Oar\_rambouillet\_v1.0. For example, for ARS-UI\_Ramb\_v2.0 16,500 coding genes have an  
372 ortholog to human (compared to 16,319 for Oar\_rambouillet\_v1.0), and the BUSCO scores  
373 demonstrate that 99.1% of the gene models (cetartiodactyla\_odb10) are complete in the new  
374 annotation versus 98.8% in the previous one. The annotation for ARS-UI\_Ramb\_v2.0 includes  
375 Iso-Sequencing for 8 tissues to improve contiguity of gene models, and CAGE sequencing for 56  
376 tissues to define TSS, that were not used to annotate Oar\_rambouillet\_v1.0. The full report for  
377 the annotation release is available at:

378 ([https://www.ncbi.nlm.nih.gov/genome/annotation\\_euk/Ovis\\_aries/104](https://www.ncbi.nlm.nih.gov/genome/annotation_euk/Ovis_aries/104)).

379

380 Using Kallisto we compared the number of expressed transcripts, for the RNA-Seq dataset of 61  
381 tissue samples from Benz2616, across the three annotations (Oar\_Rambouillet\_v1.0, Ramb1LO2  
382 (liftover) and ARS-UI\_Ramb\_v2.0). There was a considerable increase in the number of  
383 transcripts captured by the annotation for ARS-UI\_Ramb\_v2.0 (60,064) relative to  
384 Oar\_Rambouillet\_v1.0 (42,058) and the liftover annotation (Ramb1LO2) (40,910) (Figure 5).  
385 This equates to approximately 20,000 new annotated gene models for ARS-UI\_Ramb\_v2.0 and  
386 further reflects the substantial improvement over the annotation for Oar\_Rambouillet\_v1.0.

387 The lifted over annotation we have generated will provide a resource for those who wish to  
388 compare their results for ARS-UI\_Ramb\_v2.0 to previous work using

389 Oar\_Rambouillet\_v1.0. Only 2.7% of protein coding transcripts were lost (1148) lifting over the  
390 annotation for Oar\_Rambouillet\_v1.0 onto ARS-UI\_Ramb\_v2.0. According to the annotation

391 report provided by NCBI  
392 ([https://www.ncbi.nlm.nih.gov/genome/annotation\\_euk/Ovis\\_aries/104/](https://www.ncbi.nlm.nih.gov/genome/annotation_euk/Ovis_aries/104/)), 70% of the annotations  
393 were identical or had only minor changes between and Oar\_Rambouillet\_v1.0 and ARS-  
394 UI\_Ramb\_v2.0.

395

396

### 397 **Re-use potential**

398

399 The ARS-UI\_Ramb\_v2.0 genome assembly serves as a reference for genetic investigation of  
400 traits important in sheep research and production across the world. This genome is assembled  
401 from the same animal used in the Ovine FAANG Project, which provides a high-quality basis for  
402 epigenetic annotation to serve the international sheep genomics community and scientific  
403 community at large.

404

405

### 406 **Availability of supporting data**

407

408 The data sets supporting the results of this article are available in the GenBank repository,  
409 GCA\_016772045.1.

410

411

### 412 **Additional files**

413 Supplementary File 1 – Ramb\_v1.0\_NCBI103\_lifted\_over\_ARS-UI\_Ramb\_v2.0.gff.gz

414 Supplementary File 2 – Ramb1LO2\_NCBI103\_geneBank\_rna.fa

415 Supplementary File 3 – Supplementary\_File\_3\_scripts.txt

416

417

#### 418 **Author contributions**

419

420 BMM, TPLS, DMB, and BDR conceptualized the study. BMM, NEC, MPH, and TPLS selected  
421 the animal and collected samples. KW and SCM facilitated the generation of RSII, short read,  
422 and Hi-C data. TPLS facilitated the nanopore long read data generation. KMD, DMB, TPLS,  
423 BMM, and BDR performed the genome assembly, scaffolding, RNA-sequencing alignment,  
424 polishing, and quality control. MS and ELC contributed the section describing the LiftOff  
425 annotation and comparative analysis of transcript expression estimates for the three annotations.  
426 KMD, DMB, TPLS, BMM, and BDR generated tables and figures and drafted the manuscript.  
427 KMD, DMB, KW, SCM, NEC, TPLS, BMM, and BDR edited the manuscript. All authors  
428 contributed to the article and approved the final version.

429

430

#### 431 **Acknowledgements**

432

433 The authors thank Dr. Kristen Kuhn for technical support and Dr. Kreg Leymaster for overseeing  
434 the acquisition, animal care and housing, and interstate transportation of the Rambouillet ewe.

435

436

**437 Funding**

438

439 Funding was provided by Agriculture and Food Research Initiative Competitive grants from the  
440 USDA National Institute of Food and Agriculture supporting improvements of the sheep  
441 genomes (2013-67015-21228) and FAANG activities (2013-67015-21372, 2017-67016-26301).  
442 Additional funding was received from the International Sheep Genome Consortium  
443 (217201191442) and infrastructure support from a grant to R. Gibbs from the NIH NHGRI  
444 Large-Scale Sequencing Program (U54 HG003273).

445

446 DMB was supported by appropriated USDA CRIS project 5090-31000-026-00-D. TPLS was  
447 supported by appropriated USDA CRIS Project 3040-31000-100-00D. BDR was supported by  
448 appropriated USDA CRIS Project 8042-31000-001-00-D. The USDA does not endorse any  
449 products or services. Mentioning of trade names is for information purposes only. The USDA is  
450 an equal opportunity employer.

451

452

**453 References**

454

- 455 1. Pedrosa S, Uzun M, Arranz JJ, Gutiérrez-Gil B, San Primitivo F, Bayón Y. Evidence of three  
456 maternal lineages in Near Eastern sheep supporting multiple domestication events. *Proc Biol*  
457 *Sci.* 2005;272:2211-7.

458

- 459 2. Zeder MA. Domestication and early agriculture in the Mediterranean Basin: origins,  
460 diffusion, and impact. *Proc Natl Acad Sci USA*. 2008;105:11597-604.  
461
- 462 3. Chessa B, Pereira F, Arnaud F, Amorim A, Goyache F, Mainland I, Kao RR, Pemberton JM,  
463 Beraldi D, Stear MJ, Alberti A, Pittau M, Iannuzzi L, Banabazi MH, Kazwala RR, Zhang  
464 YP, Arranz JJ, Ali BA, Wang Z, Uzun M, Dione MM, Olsaker I, Holm LE, Saarma U,  
465 Ahmad S, Marzanov N, Eythorsdottir E, Holland MJ, Ajmone-Marsan P, Bruford MW,  
466 Kantanen J, Spencer TE, Palmarini M. Revealing the history of sheep domestication using  
467 retrovirus integrations. *Science*. 2009;324:532-6.  
468
- 469 4. Kijas JW, Lenstra JA, Hayes B, Boitard S, Porto Neto LR, San Cristobal M, Servin B,  
470 McCulloch R, Whan V, Gietzen K, Paiva S, Barendse W, Ciani E, Raadsma H, McEwan J,  
471 Dalrymple B, International Sheep Genomics Consortium Members. Genome-wide analysis  
472 of the world's sheep breeds reveals high levels of historic mixture and strong recent selection.  
473 *PLoS Biol*. 2012;doi:10.1371/journal.pbio.1001258.  
474
- 475 5. Burke JM, Miller JE. Relative resistance of Dorper crossbred ewes to gastrointestinal  
476 nematode infection compared with St. Croix and Katahdin ewes in the southeastern United  
477 States. *Vet Parasitol*. 2002;109:265-75.  
478
- 479 6. Bowdridge SA, Zajac AM, Notter DR. St. Croix sheep produce a rapid and greater cellular  
480 immune response contributing to reduced establishment of *Haemonchus contortus*. *Vet*  
481 *Parasitol*. 2015;208:204-10.

- 482
- 483 7. Scherf BD. World watch list for domestic animal diversity. 3<sup>rd</sup> ed. Rome: Food and  
484 Agriculture Organization of the United Nations; 2000.
- 485
- 486 8. Lv FH, Agha S, Kantanen J, Colli L, Stucki S, Kijas JW, Joost S, Li MH, Ajmone Marsan P.  
487 Adaptations to climate-mediated selective pressures in sheep. *Mol Biol Evol.* 2014;31:3324-  
488 43.
- 489
- 490 9. Cao YH, Xu SS, Shen M, Chen ZH, Gao L, Lv FH, Xie XL, Wang XH, Yang H, Liu CB,  
491 Zhou P, Wan PC, Zhang YS, Yang JQ, Pi WH, Hehua E, Berry DP, Barbato M,  
492 Esmailizadeh A, Nosrati M, Salehian-Dehkordi H, Dehghani-Qanatqestani M, Dotsev AV,  
493 Deniskova TE, Zinovieva NA, Brem G, Štěpánek O, Ciani E, Weimann C, Erhardt G,  
494 Mwacharo JM, Ahbara A, Han JL, Hanotte O, Miller JM, Sim Z, Coltman D, Kantanen J,  
495 Bruford MW, Lenstra JA, Kijas J, Li MH. Historical Introgression from Wild Relatives  
496 Enhanced Climatic Adaptation and Resistance to Pneumonia in Sheep. *Mol Biol Evol.*  
497 2021;38:838-55.
- 498
- 499 10. Dickinson WF, Lush JL. Inbreeding and the genetic history of the Rambouillet sheep in  
500 America. *J Hered.* 1933;24:19-33.
- 501
- 502 11. Zhang L, Mousel MR, Wu X, Michal JJ, Zhou X, Ding B, Dodson MV, El-Halawany NK,  
503 Lewis GS, Jiang Z. Genome-wide genetic diversity and differentially selected regions among



- 504 Suffolk, Rambouillet, Columbia, Polypay, and Targhee sheep. PLoS One. 2013;doi:  
505 10.1371/journal.pone.0065942.  
506
- 507 12. Rexroad C, Vallet J, Matukumalli LK, Reecy J, Bickhart D, Blackburn H, Boggess M, Cheng  
508 H, Clutter A, Cockett N, Ernst C, Fulton JE, Liu J, Lunney J, Neibergs H, Purcell C, Smith  
509 TPL, Sonstegard T, Taylor J, Telugu B, Eenennaam AV, Tassell CPV, Wells K. Genome to  
510 Phenome: Improving Animal Health, Production, and Well-Being - A New USDA Blueprint  
511 for Animal Genome Research 2018-2027. Front Genet. 2019;10:327.  
512
- 513 13. Jiang Y, Xie M, Chen W, Talbot R, Maddox JF, Faraut T, Wu C, Muzny DM, Li Y, Zhang  
514 W, Stanton JA, Brauning R, Barris WC, Hourlier T, Aken BL, Searle SMJ, Adelson DL,  
515 Bian C, Cam GR, Chen Y, Cheng S, DeSilva U, Dixen K, Dong Y, Fan G, Franklin IR, Fu S,  
516 Guan R, Highland MA, Holder ME, Huang G, Ingham AB, Jhangiani SN, Kalra D, Kovar  
517 CL, Lee SL, Liu W, Liu X, Lu C, Lv T, Mathew T, McWilliam S, Menzies M, Pan S,  
518 Robelin D, Servin B, Townley D, Wang W, Wei B, White SN, Yang X, Ye C, Yue Y, Zeng  
519 P, Zhou Q, Hansen JB, Kristensen K, Gibbs RA, Flicek P, Warkup CC, Jones HE, Oddy VH,  
520 Nicholas FW, McEwan JC, Kijas J, Wang J, Worley KC, Archibald AL, Cockett N, Xu X,  
521 Wang W, Dalrymple BP. The sheep genome illuminates biology of the rumen and lipid  
522 metabolism. Science. 2014;344:1168-1173.  
523
- 524 14. Murdoch BM. The functional annotation of the sheep genome project. J Anim Sci.  
525 2019;97:16.  
526

- 527 15. Salavati M, Caulton A, Clark R, Gazova I, Smith TPL, Worley KC, Cockett NE, Archibald  
528 AL, Clarke SM, Murdoch BM, Clark EL. Global Analysis of Transcription Start Sites in the  
529 New Ovine Reference Genome (*Oar rambouillet v1.0*). *Front Genet.* 2020;11:580580.  
530
- 531 16. FAANG Data Coordination Center. 2016.  
532 [https://data.faang.org/api/fire\\_api/samples/USU\\_SOP\\_Ovine\\_Benz2616\\_Tissue](https://data.faang.org/api/fire_api/samples/USU_SOP_Ovine_Benz2616_Tissue)  
533 [\\_Collection\\_20160426.pdf](https://data.faang.org/api/fire_api/samples/USU_SOP_Ovine_Benz2616_Tissue).  
534
- 535 17. European Bioinformatics Institute, BioSample SAMEG329607. 2016.  
536 <https://www.ebi.ac.uk/biosamples/samples/SAMEG329607>.  
537
- 538 18. Guppy (2021). Guppy basecaller (Version 3.1) [www.nanoporetech.com](http://www.nanoporetech.com).  
539
- 540 19. Koren S, Walenz BP, Berlin K, Miller JR, Bergman NH, Phillippy AM. Canu: scalable and  
541 accurate long-read assembly via adaptive *k*-mer weighting and repeat separation. *Genome*  
542 *Res.* 2017;27:722-36.  
543
- 544 20. Heaton MP, Smith TPL, Bickhart DM, Vander Ley BL, Kuehn LA, Oppenheimer J, Shafer  
545 WR, Schuetze FT, Stroud B, McClure JC, Barfield JP, Blackburn HD, Kalbfleisch TS,  
546 Davenport KM, Kuhn KL, Green RE, Shapiro B, Rosen BD. A Reference Genome Assembly  
547 of Simmental Cattle, *Bos taurus taurus*. *J Hered.* 2021;112:184-91.  
548

- 549 21. Oppenheimer J, Rosen BD, Heaton MP, Vander Ley BL, Shafer WR, Schuetze FT, Stroud B,  
550 Kuehn LA, McClure JC, Barfield JP, Blackburn HD, Kalbfleisch TS, Bickhart DM,  
551 Davenport KM, Kuhn KL, Green RE, Shapiro B, Smith TPL. A Reference Genome  
552 Assembly of American Bison, *Bison bison bison*. *J Hered.* 2021;112:174-183.  
553
- 554 22. Arima Genomics Mapping Pipeline (2019). ArimaGenomics  
555 [https://github.com/ArimaGenomics/mapping\\_pipeline](https://github.com/ArimaGenomics/mapping_pipeline).  
556
- 557 23. Li H, Handsaker B, Wysoker A, Fennell T, Ruan J, Homer N, Marth G, Abecasis G, Durbin  
558 R; 1000 Genome Project Data Processing Subgroup. The Sequence Alignment/Map format  
559 and SAMtools. *Bioinformatics.* 2009;25:2078-9.  
560
- 561 24. PicardTools (2019). Picard Toolkit, Broad Institute (Version 2.9.2)  
562 <http://broadinstitute.github.io/picard>.  
563
- 564 25. Quinlan AR. BEDTools: The Swiss-Army Tool for Genome Feature Analysis.  
565 *Bioinformatics.* 2014;47:1-34.  
566
- 567 26. Ghurye J, Pop M, Koren S, Bickhart D, Chin CS. Scaffolding of long read assemblies using  
568 long range contact information. *BMC Genomics.* 2017;18:527.  
569
- 570 27. Yardımcı GG, Noble W. Software tools for visualizing Hi-C data. *Genome Biol.* 2017;18:26.  
571

- 572 28. Heng L. Minimap2: pairwise alignment for nucleotide sequences. *Bioinformatics*.  
573 2018;34:3094-100.  
574
- 575 29. D-Genies (2018). D-Genies (Version 1.2.0) [https://github.com/genotoul-](https://github.com/genotoul-bioinfo/dgenies/releases/tag/v1.2.0)  
576 [bioinfo/dgenies/releases/tag/v1.2.0](https://github.com/genotoul-bioinfo/dgenies/releases/tag/v1.2.0).  
577
- 578 30. CombineFasta agp2fasta (2020). CombineFasta (Version 0.0.17)  
579 <https://github.com/njdbickhart/CombineFasta>.  
580
- 581 31. Loman N, Quick J Simpson J. A complete bacterial genome assembled de novo using only  
582 nanopore sequencing data. *Nat Methods*. 2015;12:733-735.  
583
- 584 32. NanoGrid (2018). NanoGrid <https://github.com/skoren/NanoGrid>.  
585
- 586 33. Guan D, McCarthy SA, Wood J, Howe K, Wang Y, Durbin R. Identifying and removing  
587 haplotypic duplication in primary genome assemblies. *Bioinformatics*. 2020;36:2896-8.  
588
- 589 34. Smit AFA, Hubley R, Green P. RepeatMasker Open-4.0. 2013-2015.  
590 <https://www.repeatmasker.org>.  
591
- 592 35. Garrison E, Marth G. Haplotype-based variant detection from short-read sequencing. *arXiv*  
593 preprint. 2012:1207.3907.  
594

- 595 36. Merfin (2021). Merfin <https://github.com/arangrhie/merfin>.
- 596
- 597 37. Trim Galore (2020). TrimGalore (Version 0.6.6)
- 598 [https://www.bioinformatics.babraham.ac.uk/projects/trim\\_galore/](https://www.bioinformatics.babraham.ac.uk/projects/trim_galore/).
- 599
- 600 38. Dobin A, Davis CA, Schlesinger F, Drenkow J, Zaleski C, Jha S, Batut P, Chaisson M, &
- 601 Gingeras TR. STAR: ultrafast universal RNA-seq aligner. *Bioinformatics*. 2013;29:15-21.
- 602
- 603 39. Li H. A statistical framework for SNP calling, mutation discovery, association mapping and
- 604 population genetical parameter estimation from sequencing data. *Bioinformatics*.
- 605 2011;27:2987-93.
- 606
- 607 40. Shumate, A., and Salzberg, S.L. (2020). Liftoff: accurate mapping of gene annotations.
- 608 *Bioinformatics*. Doi:10.1093/bioinformatics/btaa1016.
- 609
- 610 41. Bray, N. L., Pimentel, H., Melsted, P., and Pachter, L. (2016). Near-optimal probabilistic
- 611 RNA-seq quantification. *Nat. Biotechnol.* 34, 525–527. doi:10.1038/nbt.3519.
- 612
- 613 42. Quinlan, A. R., and Hall, I. M. (2010). BEDTools: A flexible suite of utilities for comparing
- 614 genomic features. *Bioinformatics* 26, 841–842. doi:10.1093/bioinformatics/btq033.
- 615
- 616 43. Themis-ASM (2020). Themis-ASM pipeline <https://github.com/njdbickhart/Themis-ASM>.
- 617

- 618 44. Vezzi F, Narzisi G, Mishra B. Reevaluating Assembly Evaluations with Feature Response  
619 Curves: GAGE and Assemblathon. PLoS ONE. 2012;7:e52210.  
620
- 621 45. Rhie A, Walenz BP, Koren S, Phillippy AM. Merqury: reference-free quality, completeness,  
622 and phasing assessment for genome assemblies. Genome Biol. 2020;21:245.  
623
- 624 46. Koren S, Rhie A, Walenz BP, Dilthey AT, Bickhart DM, Kingan SB, Hiendleder S, Williams  
625 JL, Smith TPL, Phillippy AM. De novo assembly of haplotype-resolved genomes with trio  
626 binning. Nat Biotechnol. 2018;10.1038/nbt.4277.  
627  
628  
629

## 630 Tables

631

632 Table 1: Assembly quality statistics comparison

| Assembly Statistic                    | ARS-UI_Ramb_v2.0 | Oar_rambouillet_v1.0 | Oar_v4.0      | Description                                                                                                                             |
|---------------------------------------|------------------|----------------------|---------------|-----------------------------------------------------------------------------------------------------------------------------------------|
| <b>Total Length (Mb)</b>              | 2628.15          | 2869.91              | 2615.52       | Assembly length in Mbp                                                                                                                  |
| <b>Contig Number</b>                  | 226              | 7,486                | 48,482        | Total number of contigs                                                                                                                 |
| <b>Contig N50 (bp)</b>                | 43,178,051       | 2,572,683            | 150,472       | Half the length of the assembly is in contigs of this size or greater                                                                   |
| <b>Contig L50 (number of contigs)</b> | 24               | 313                  | 5,008         | The smallest number of contigs whose length sum make up half of the assembly size                                                       |
| <b>Scaffold Number</b>                | 142              | 2,641                | 5,466         | Total number of scaffolds and unplaced contigs in the assembly                                                                          |
| <b>merQV</b>                          | 44.7721*         | 32.1705*             | 31.9131**     | Kmer based quality from Merqury, which estimates the frequency of consensus errors in the assembly [45]                                 |
| <b>merErrorRate</b>                   | 0.000033327*     | 0.00060662*          | 0.000643714** | Kmer based error rate from Merqury, which estimates error rate of the assembly based on errors in kmers [45]                            |
| <b>merCompleteness</b>                | 93.0479*         | 93.4711*             | 92.2182**     | Proportion of complete assembly estimated by Merqury based on “reliable” kmers, or kmers unlikely to be caused by sequencing error [45] |

|                    |        |        |         |                                                                                        |
|--------------------|--------|--------|---------|----------------------------------------------------------------------------------------|
| <b>baseQV</b>      | 41.84* | 40.69* | 32.40** | SNP and INDEL quality value estimated from short read data mapped to the assembly [46] |
| <b>Unmap%</b>      | 0.96*  | 1.00*  | 0.73**  | Percentage of short reads that are unmapped to each assembly [46]                      |
| <b>COMPLETESC</b>  | 90.7   | 90.1   | 86.1    | Percent of complete, single copy BUSCOs                                                |
| <b>COMPLETEDUP</b> | 1.4    | 1.6    | 1.0     | Percent of complete, duplicated BUSCOs                                                 |
| <b>FRAGMENT</b>    | 2.0    | 2.1    | 3.7     | Percent of fragmented BUSCOs                                                           |
| <b>MISSING</b>     | 5.9    | 6.2    | 9.2     | Percent of missing BUSCOs                                                              |

633

634 \*Short read sequencing from the Rambouillet ewe used to assemble both ARS-UI\_Ramb\_v2.0

635 and Oar\_rambouillet\_v1.0 was used in these quality values.

636 \*\*Short read sequencing from the Texel animal used to assemble Oar\_v4.0 was used in these

637 quality values.

638

639

640 Table 2: RNA-seq alignment statistics to ARS-UI\_Ramb\_v2.0 and Oar\_rambouillet\_v1.0 from

641 five different tissues.

642

643 \* Genomes include v2.0 (ARS-UI\_Ramb\_v2.0) and v1.0 (Oar\_rambouillet\_v1.0) and the

| Tissue                  | Genome* | # input reads | # reads uniquely mapped | % of reads uniquely mapped | # reads multi-mapped | % reads multi-mapped | # reads unmapped | % reads unmapped | # indels |
|-------------------------|---------|---------------|-------------------------|----------------------------|----------------------|----------------------|------------------|------------------|----------|
| Skin                    | v2.0    | 62,630,134    | 53,990,480              | 86.20%                     | 6,684,213            | 10.67%               | 1,955,441        | 3.12%            | 962      |
|                         | v1.0    |               | 52,523,732              | 83.86%                     | 8,114,599            | 12.96%               | 1,991,803        | 3.18%            | 2,512    |
|                         | Δ       | N/A           | 1,466,748               | 2.34%                      | -1,430,386           | -2.29%               | -36,362          | -0.06%           | -1,550   |
| Thalamus                | v2.0    | 54,655,873    | 45,721,452              | 83.65%                     | 5,414,620            | 9.91%                | 3,519,801        | 6.44%            | 649      |
|                         | v1.0    |               | 44,904,096              | 82.16%                     | 6,126,363            | 11.21%               | 3,625,414        | 6.63%            | 1,054    |
|                         | Δ       | N/A           | 817,356                 | 1.49%                      | -711,743             | -1.30%               | -105,613         | -0.19%           | -405     |
| Pituitary               | v2.0    | 43,368,663    | 39,710,031              | 91.56%                     | 2,405,103            | 5.55%                | 1,253,529        | 2.89%            | 604      |
|                         | v1.0    |               | 34,115,417              | 78.66%                     | 7,866,251            | 18.14%               | 1,386,995        | 3.20%            | 960      |
|                         | Δ       | N/A           | 5,594,614               | 12.90%                     | -5,461,148           | -12.59%              | -133,466         | -0.31%           | -356     |
| Lymph node – mesenteric | v2.0    | 43,673,576    | 38,819,419              | 88.88%                     | 3,562,121            | 8.16%                | 1,292,036        | 2.96%            | 684      |
|                         | v1.0    |               | 38,296,065              | 87.69%                     | 4,057,915            | 9.29%                | 1,319,596        | 3.02%            | 999      |
|                         | Δ       | N/A           | 523,354                 | 1.19%                      | -495,794             | -1.13%               | -27,560          | -0.06%           | -315     |
| Abomasum pylorus        | v2.0    | 45,977,534    | 41,018,529              | 89.21%                     | 2,978,042            | 6.48%                | 1,980,963        | 4.31%            | 512      |
|                         | v1.0    |               | 40,403,981              | 87.88%                     | 3,533,015            | 7.68%                | 2,040,538        | 4.44%            | 846      |
|                         | Δ       | N/A           | 614,548                 | 1.33%                      | -554,973             | -1.20%               | -59,575          | -0.13%           | -334     |

644 difference (Δ).

645

646

647

648

649

650 **Figure Legends**

651



652 Figure 1: Image of Benz 2616 Rambouillet ewe selected for the ovine reference genome  
653 assembly.

654

655 Figure 2: Hi-C contact map comparison of ARS-UI\_Ramb\_v2.0 A) directly after scaffolding and  
656 before manual curation and B) after manual curation with scaffold rearrangements and joins.

657

658 Figure 3: Assembly error comparison between ARS-UI\_Ramb\_v2.0, Oar\_rambouillet\_v1.0, and  
659 Oar\_v4.0 in A) a feature response curve displaying sorted lengths of the assemblies with the  
660 fewest errors and B) specific feature counts for each genome and descriptions.

661

662 Figure 4: Dotplot comparison of genome assemblies between A) ARS-UI\_Ramb\_v2.0 and  
663 Oar\_rambouillet\_v1.0, and B) ARS-UI\_Ramb\_v2.0 and Oar\_v4.0.

664

665 Figure 5: Kallisto comparison of the number of expressed transcripts for the RNA-Seq dataset of  
666 61 tissue samples from Benz2616, across the three annotations (Oar\_Rambouillet\_v1.0,  
667 Ramb1LO2 (liftover) and ARS-UI\_Ramb\_v2.0).

Table 1: Assembly quality statistics comparison

| Assembly Statistic                    | ARS-UI_Ramb_v2.0 | Oar_rambouillet_v1.0 | Oar_v4.0      | Description                                                                                                                             |
|---------------------------------------|------------------|----------------------|---------------|-----------------------------------------------------------------------------------------------------------------------------------------|
| <b>Total Length (Mb)</b>              | 2628.15          | 2869.91              | 2615.52       | Assembly length in Mbp                                                                                                                  |
| <b>Contig Number</b>                  | 226              | 7,486                | 48,482        | Total number of contigs                                                                                                                 |
| <b>Contig N50 (bp)</b>                | 43,178,051       | 2,572,683            | 150,472       | Half the length of the assembly is in contigs of this size or greater                                                                   |
| <b>Contig L50 (number of contigs)</b> | 24               | 313                  | 5,008         | The smallest number of contigs whose length sum make up half of the assembly size                                                       |
| <b>Scaffold Number</b>                | 142              | 2,641                | 5,466         | Total number of scaffolds and unplaced contigs in the assembly                                                                          |
| <b>merQV</b>                          | 44.7721*         | 32.1705*             | 31.9131**     | Kmer based quality from Merqury, which estimates the frequency of consensus errors in the assembly [42]                                 |
| <b>merErrorRate</b>                   | 0.000033327*     | 0.00060662*          | 0.000643714** | Kmer based error rate from Merqury, which estimates error rate of the assembly based on errors in kmers [42]                            |
| <b>merCompleteness</b>                | 93.0479*         | 93.4711*             | 92.2182**     | Proportion of complete assembly estimated by Merqury based on “reliable” kmers, or kmers unlikely to be caused by sequencing error [42] |
| <b>baseQV</b>                         | 41.84*           | 40.69*               | 32.40**       | SNP and INDEL quality value estimated from short read data mapped to the assembly [43]                                                  |
| <b>Unmap%</b>                         | 0.96*            | 1.00*                | 0.73**        | Percentage of short reads that are unmapped to each assembly [43]                                                                       |
| <b>COMPLETESC</b>                     | 90.7             | 90.1                 | 86.1          | Percent of complete, single copy BUSCOs                                                                                                 |
| <b>COMPLETEDUP</b>                    | 1.4              | 1.6                  | 1.0           | Percent of complete, duplicated BUSCOs                                                                                                  |
| <b>FRAGMENT</b>                       | 2.0              | 2.1                  | 3.7           | Percent of fragmented BUSCOs                                                                                                            |
| <b>MISSING</b>                        | 5.9              | 6.2                  | 9.2           | Percent of missing BUSCOs                                                                                                               |

\*Short read sequencing from the Rambouillet ewe used to assemble both ARS-UI\_Ramb\_v2.0 and Oar\_rambouillet\_v1.0 was used in these quality values.

\*\*Short read sequencing from the Texel animal used to assemble Oar\_v4.0 was used in these quality values.

Table 2: RNA-seq alignment statistics to ARS-UI\_Ramb\_v2.0 and Oar\_rambouillet\_v1.0 from five different tissues.

| Tissue                  | Genome* | # input reads | # reads uniquely mapped | % of reads uniquely mapped | # reads multi-mapped | % reads multi-mapped | # reads unmapped | % reads unmapped | # indels |
|-------------------------|---------|---------------|-------------------------|----------------------------|----------------------|----------------------|------------------|------------------|----------|
| Skin                    | v2.0    | 62,630,134    | 53,990,480              | 86.20%                     | 6,684,213            | 10.67%               | 1,955,441        | 3.12%            | 962      |
|                         | v1.0    |               | 52,523,732              | 83.86%                     | 8,114,599            | 12.96%               | 1,991,803        | 3.18%            | 2,512    |
|                         | Δ       | N/A           | 1,466,748               | 2.34%                      | -1,430,386           | -2.29%               | -36,362          | -0.06%           | -1,550   |
| Thalamus                | v2.0    | 54,655,873    | 45,721,452              | 83.65%                     | 5,414,620            | 9.91%                | 3,519,801        | 6.44%            | 649      |
|                         | v1.0    |               | 44,904,096              | 82.16%                     | 6,126,363            | 11.21%               | 3,625,414        | 6.63%            | 1,054    |
|                         | Δ       | N/A           | 817,356                 | 1.49%                      | -711,743             | -1.30%               | -105,613         | -0.19%           | -405     |
| Pituitary               | v2.0    | 43,368,663    | 39,710,031              | 91.56%                     | 2,405,103            | 5.55%                | 1,253,529        | 2.89%            | 604      |
|                         | v1.0    |               | 34,115,417              | 78.66%                     | 7,866,251            | 18.14%               | 1,386,995        | 3.20%            | 960      |
|                         | Δ       | N/A           | 5,594,614               | 12.90%                     | -5,461,148           | -12.59%              | -133,466         | -0.31%           | -356     |
| Lymph node – mesenteric | v2.0    | 43,673,576    | 38,819,419              | 88.88%                     | 3,562,121            | 8.16%                | 1,292,036        | 2.96%            | 684      |
|                         | v1.0    |               | 38,296,065              | 87.69%                     | 4,057,915            | 9.29%                | 1,319,596        | 3.02%            | 999      |
|                         | Δ       | N/A           | 523,354                 | 1.19%                      | -495,794             | -1.13%               | -27,560          | -0.06%           | -315     |
| Abomasum pylorus        | v2.0    | 45,977,534    | 41,018,529              | 89.21%                     | 2,978,042            | 6.48%                | 1,980,963        | 4.31%            | 512      |
|                         | v1.0    |               | 40,403,981              | 87.88%                     | 3,533,015            | 7.68%                | 2,040,538        | 4.44%            | 846      |
|                         | Δ       | N/A           | 614,548                 | 1.33%                      | -554,973             | -1.20%               | -59,575          | -0.13%           | -334     |

\* Genomes include v2.0 (ARS-UI\_Ramb\_v2.0) and v1.0 (Oar\_rambouillet\_v1.0) and the difference (Δ).

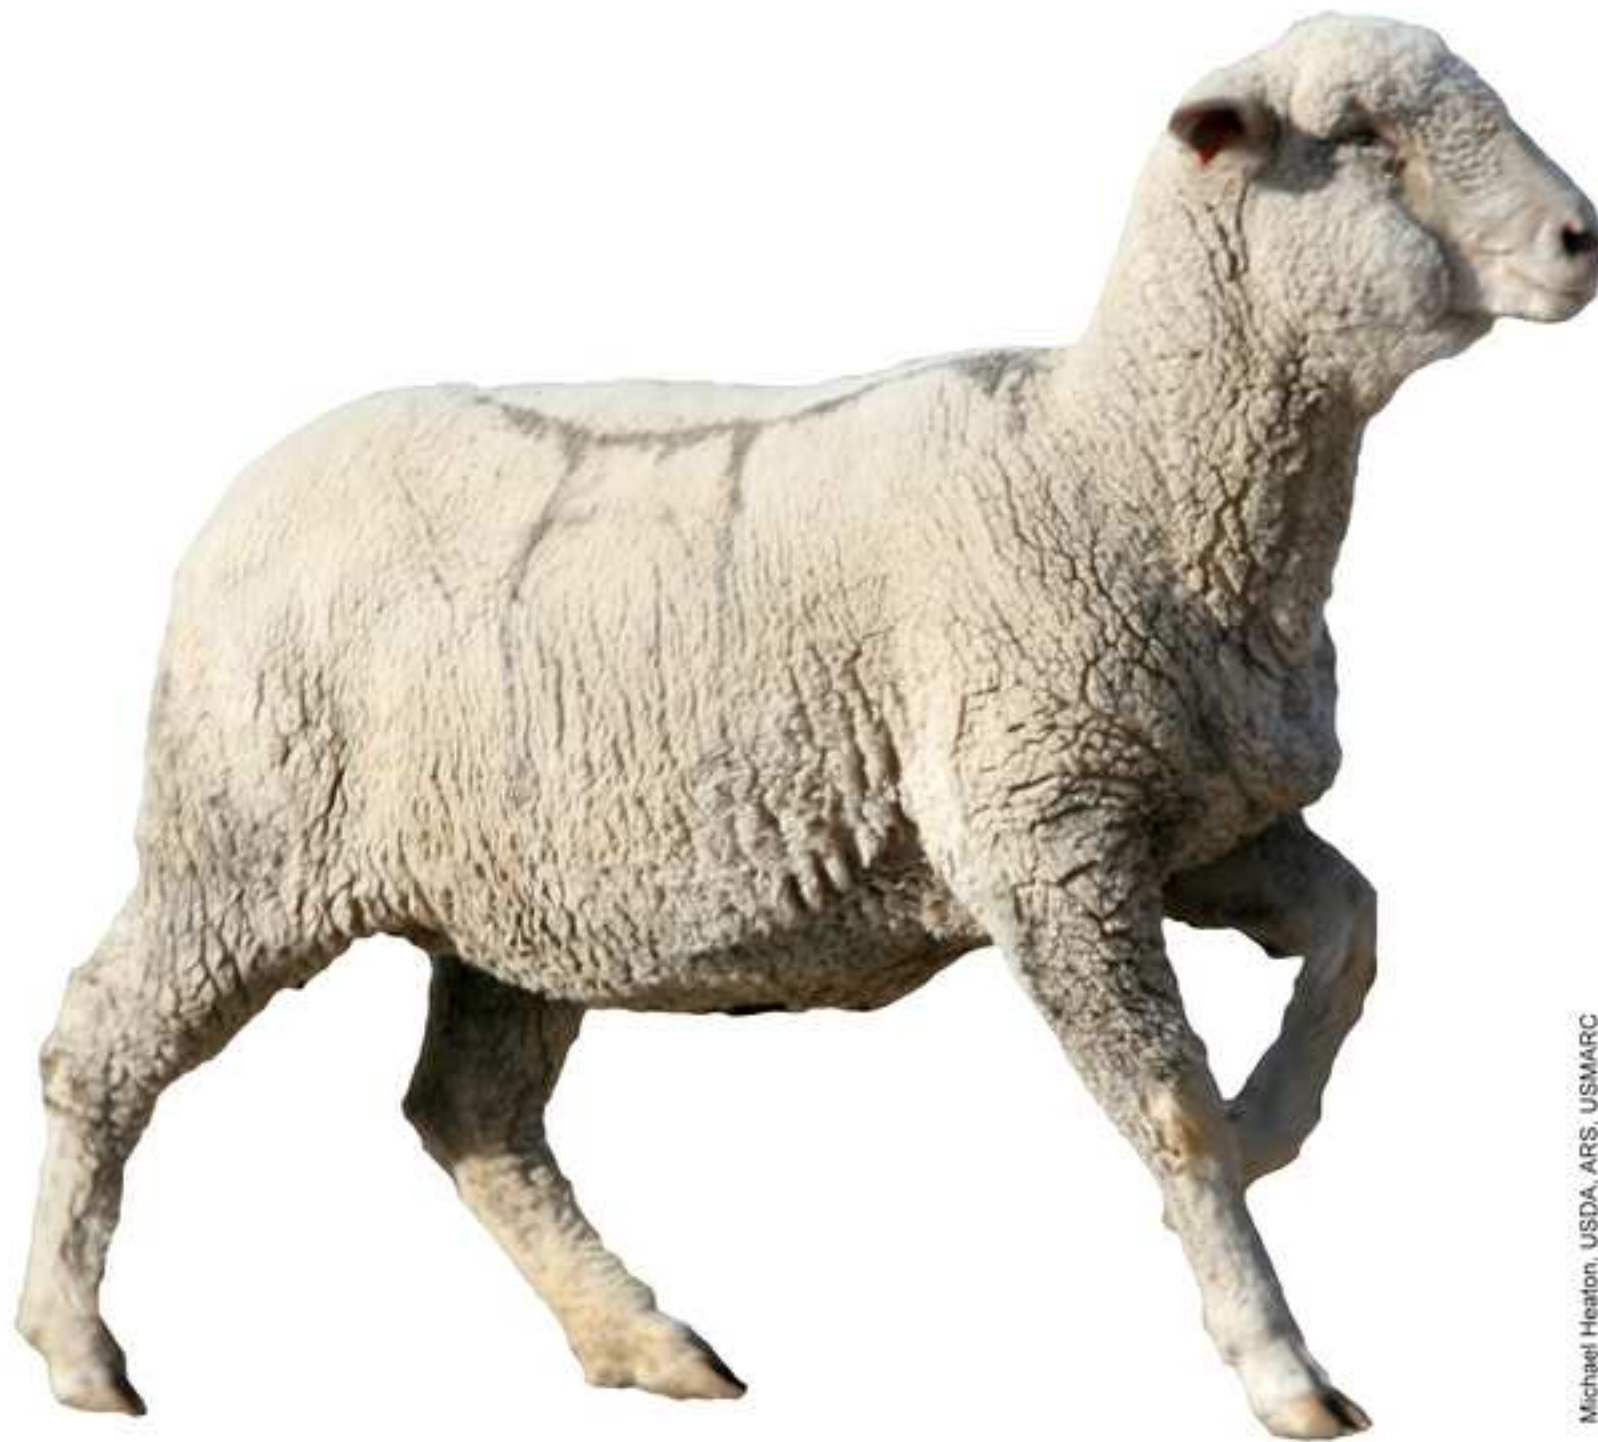

Michael Heaton, USDA, ARS, USMARC

**A**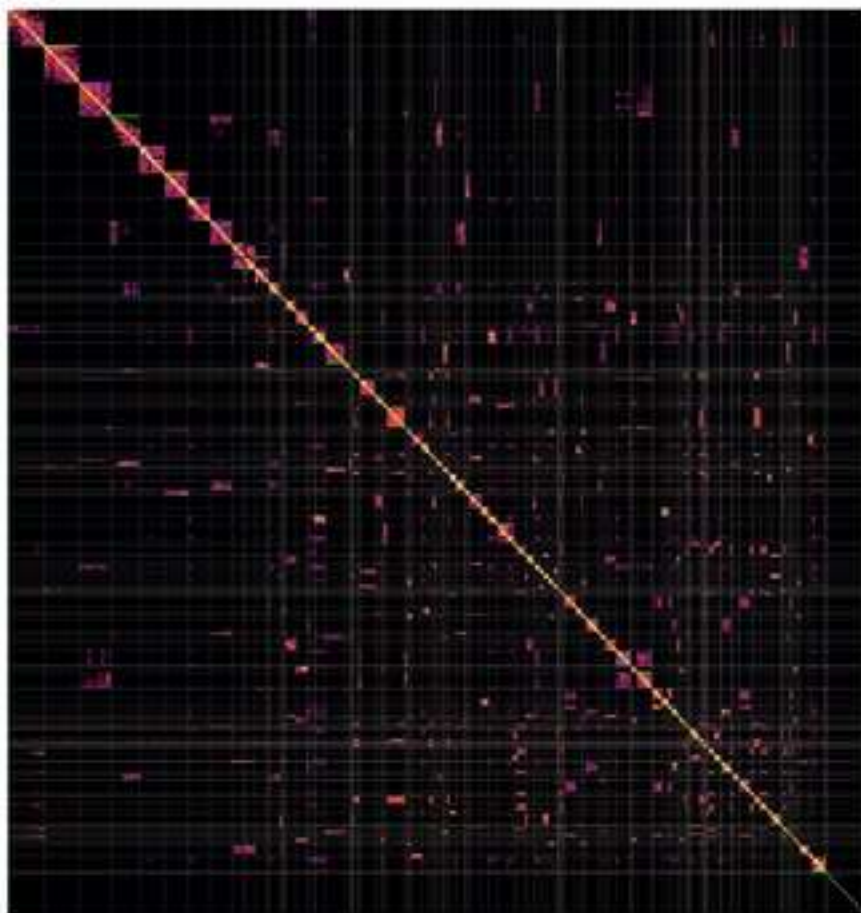**B**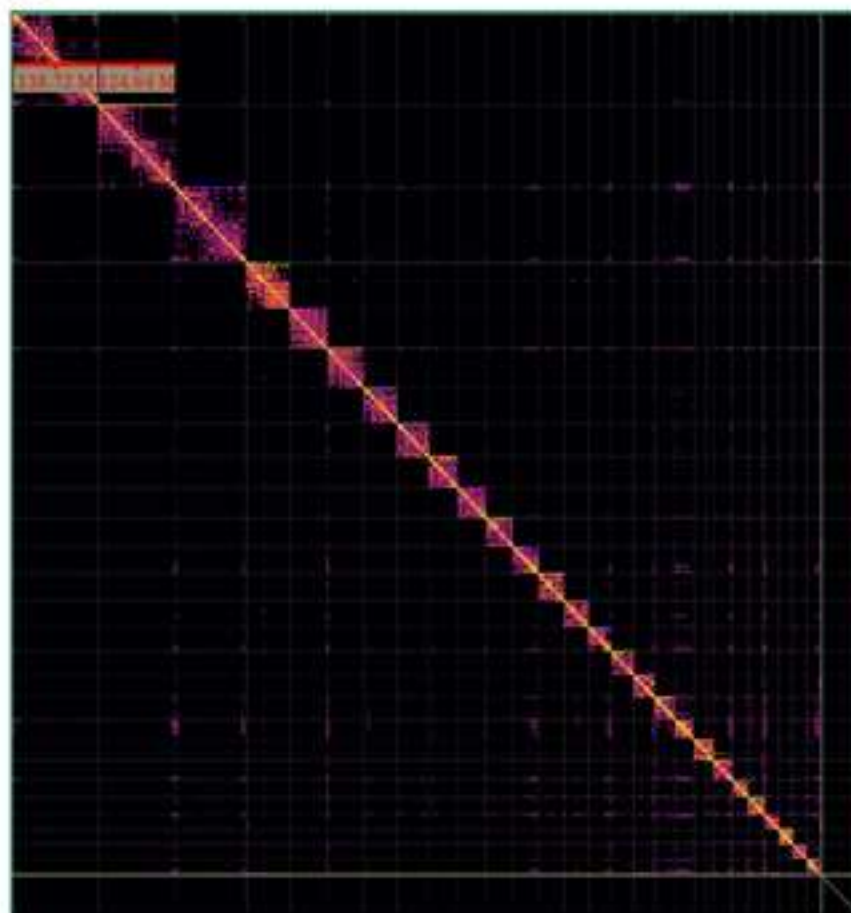

**A**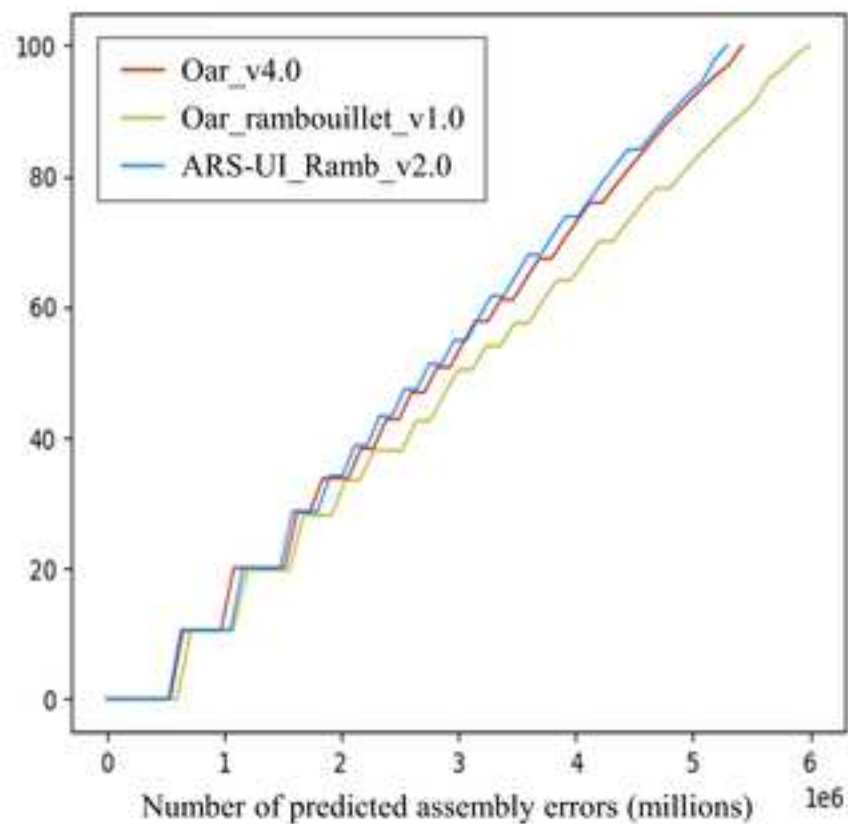**B**

| Features         | ARS-UI_Ramb_v2.0 | Oar_rambouillet_v1.0 | Oar_v4.0 | Description                                                |
|------------------|------------------|----------------------|----------|------------------------------------------------------------|
| LOW_COV_PE       | 7212             | 95166                | 89103    | Low read coverage areas                                    |
| LOW_NORM_COV_PE  | 2990             | 24381                | 26860    | Low coverage of normal paired end reads                    |
| HIGH_SPAN_PE     | 6522             | 22628                | 33232    | Regions with high numbers of inter-contig paired end reads |
| HIGH_COV_PE      | 2051             | 3630                 | 26276    | Regions with high read coverage                            |
| HIGH_NORM_COV_PE | 2366             | 2633                 | 1875     | Regions with high coverage of normal paired end reads      |
| HIGH_OUTIE_PE    | 2514             | 28766                | 37495    | Regions with high counts of improperly paired reads        |
| HIGH_SINGLE_PE   | 0                | 0                    | 0        | Regions with high counts of single unmapped reads          |
| STRECH_PE        | 74               | 84                   | 67       | Regions with high Comp/Expansion (CE) statistics           |
| COMPR_PE         | 87               | 92                   | 44       | Regions with low Comp/Expansion (CE) statistics            |

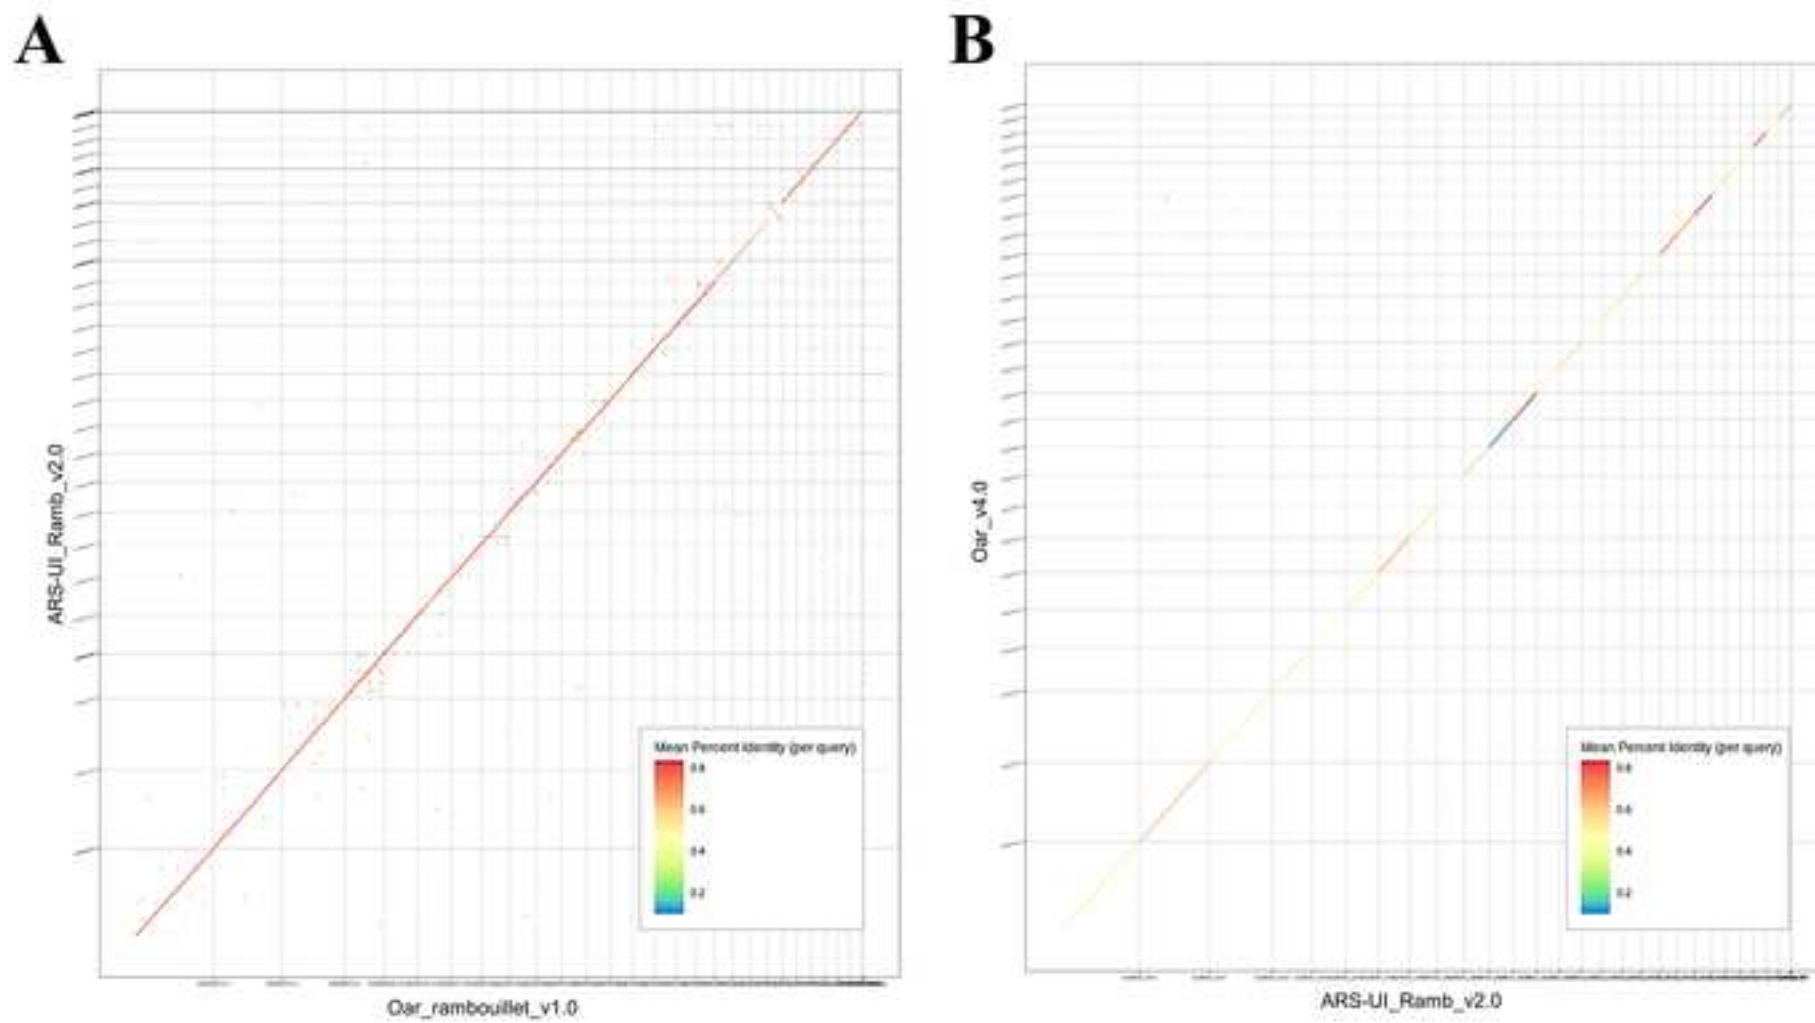



**A**

Expressed transcripts (TPM>0) in Benz2616 tissues (n=61) based on Oar\_rambouillet\_v1.0 and ARS-UI\_Ramb\_v2.0 (RefSeq v103 & 104 respectively)

| gene_biotype   | Ramb1 | Ramb1LO2 | Ramb2 | 1LO2 vs Ramb1 | 1LO2 vs Ramb2 | Ramb1 vs Ramb2 |
|----------------|-------|----------|-------|---------------|---------------|----------------|
| guide_RNA      | 30    | 29       | 30    | -1            | -1            | 0              |
| lncRNA         | 3929  | 3752     | 6018  | -177          | -2266         | -2089          |
| protein_coding | 42058 | 40910    | 60064 | -1148         | -19154        | -18006         |
| rRNA           | 272   | 17       | 22    | -255          | -5            | 250            |
| snoRNA         | 644   | 590      | 593   | -54           | -3            | 51             |
| snRNA          | 997   | 907      | 879   | -90           | 28            | 118            |

**B**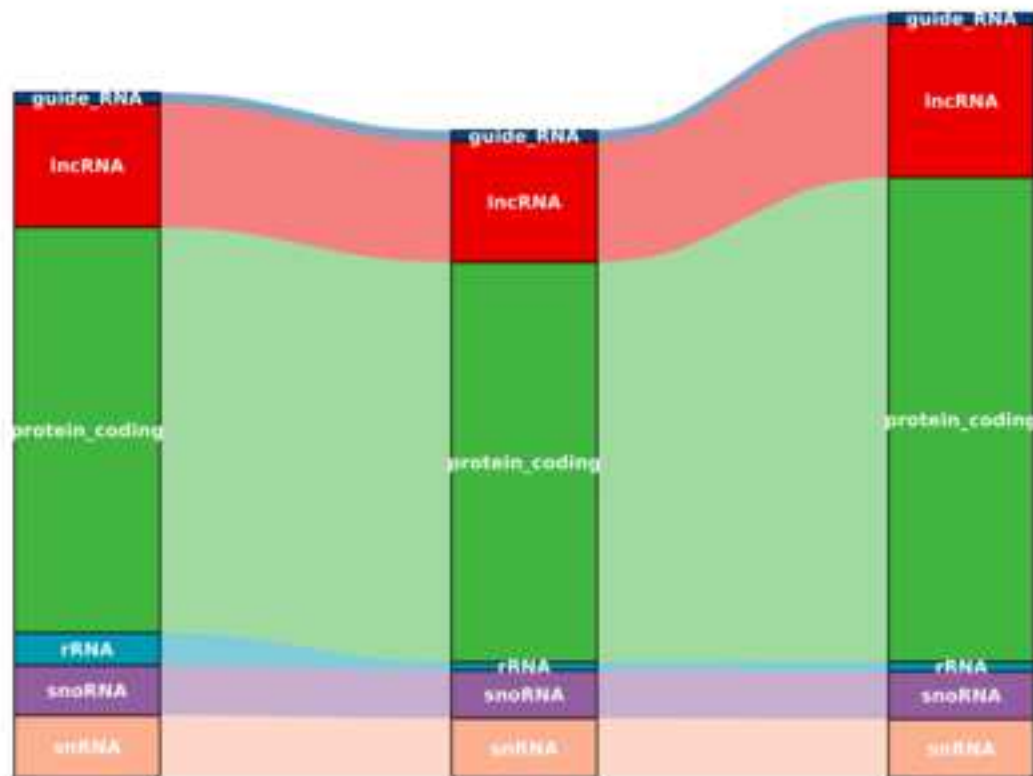

Oar\_rambouillet\_v1.0

Ramb1\_LO\_Ramb2

ARS-UI\_Ramb\_v2.0





Click here to access/download

**Supplementary Material**

Ramb\_v1.0\_NCBI103\_lifted\_over\_ARS-  
UI\_Ramb\_v2.0.gff

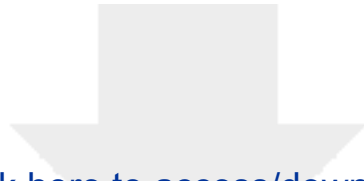

[Click here to access/download](#)

**Supplementary Material**

[Ramb1LO2\\_NCBI103\\_geneBank\\_rna.fa](#)

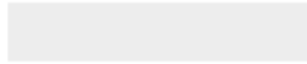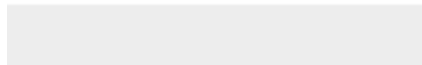

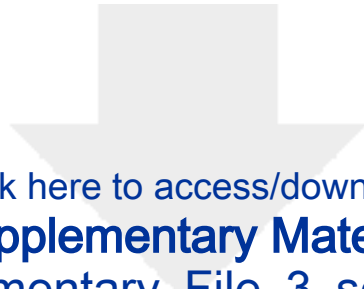

Click here to access/download  
**Supplementary Material**  
Supplementary\_File\_3\_scripts.txt

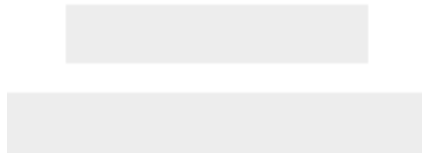

Supplement: giab096_giga-d-21-00165_original_submission.pdf [file giab096_giga-d-21-00165_original_submission.pdf]
