# Supplementary material for: An improved ovine reference genome assembly to facilitate in-depth functional annotation of the sheep genome
Source: PubMed Central journal article supplement (PMC8848310; doi:10.1093/gigascience/giab096), 2022-02-04

# GigaScience

## An improved ovine reference genome assembly to facilitate in depth functional annotation of the sheep genome --Manuscript Draft--

|                                                               |                                                                                                                                                                                                                                                                                                                                                                                                                                                                                                                                                                                                                                                                                                                                                                                                                                                                                                                                                                                                                                                                                                                                                                                                                                                                                                                                                                                                                                                                                                                                                                                                                                                                                                                                                                                                                                                                                                                                                                     |                                                               |                   |                                                               |                       |                                                               |                       |                                                        |                   |                                                     |                       |                                                    |                        |                                                     |                       |
|---------------------------------------------------------------|---------------------------------------------------------------------------------------------------------------------------------------------------------------------------------------------------------------------------------------------------------------------------------------------------------------------------------------------------------------------------------------------------------------------------------------------------------------------------------------------------------------------------------------------------------------------------------------------------------------------------------------------------------------------------------------------------------------------------------------------------------------------------------------------------------------------------------------------------------------------------------------------------------------------------------------------------------------------------------------------------------------------------------------------------------------------------------------------------------------------------------------------------------------------------------------------------------------------------------------------------------------------------------------------------------------------------------------------------------------------------------------------------------------------------------------------------------------------------------------------------------------------------------------------------------------------------------------------------------------------------------------------------------------------------------------------------------------------------------------------------------------------------------------------------------------------------------------------------------------------------------------------------------------------------------------------------------------------|---------------------------------------------------------------|-------------------|---------------------------------------------------------------|-----------------------|---------------------------------------------------------------|-----------------------|--------------------------------------------------------|-------------------|-----------------------------------------------------|-----------------------|----------------------------------------------------|------------------------|-----------------------------------------------------|-----------------------|
| <b>Manuscript Number:</b>                                     | GIGA-D-21-00165R2                                                                                                                                                                                                                                                                                                                                                                                                                                                                                                                                                                                                                                                                                                                                                                                                                                                                                                                                                                                                                                                                                                                                                                                                                                                                                                                                                                                                                                                                                                                                                                                                                                                                                                                                                                                                                                                                                                                                                   |                                                               |                   |                                                               |                       |                                                               |                       |                                                        |                   |                                                     |                       |                                                    |                        |                                                     |                       |
| <b>Full Title:</b>                                            | An improved ovine reference genome assembly to facilitate in depth functional annotation of the sheep genome                                                                                                                                                                                                                                                                                                                                                                                                                                                                                                                                                                                                                                                                                                                                                                                                                                                                                                                                                                                                                                                                                                                                                                                                                                                                                                                                                                                                                                                                                                                                                                                                                                                                                                                                                                                                                                                        |                                                               |                   |                                                               |                       |                                                               |                       |                                                        |                   |                                                     |                       |                                                    |                        |                                                     |                       |
| <b>Article Type:</b>                                          | Data Note                                                                                                                                                                                                                                                                                                                                                                                                                                                                                                                                                                                                                                                                                                                                                                                                                                                                                                                                                                                                                                                                                                                                                                                                                                                                                                                                                                                                                                                                                                                                                                                                                                                                                                                                                                                                                                                                                                                                                           |                                                               |                   |                                                               |                       |                                                               |                       |                                                        |                   |                                                     |                       |                                                    |                        |                                                     |                       |
| <b>Funding Information:</b>                                   | <table border="1"><tr><td>National Institute of Food and Agriculture (2013-67015-21228)</td><td>Dr. Kim C. Worley</td></tr><tr><td>National Institute of Food and Agriculture (2013-67015-21372)</td><td>Dr. Noelle E. Cockett</td></tr><tr><td>National Institute of Food and Agriculture (2017-67016-26301)</td><td>Dr. Brenda M. Murdoch</td></tr><tr><td>International Sheep Genomics Consortium (217201191442)</td><td>Dr. Kim C. Worley</td></tr><tr><td>Agricultural Research Service (5090-31000-026-00-D)</td><td>Dr. Derek M. Bickhart</td></tr><tr><td>Agricultural Research Service (3040-31000-100-00D)</td><td>Dr. Timothy P.L. Smith</td></tr><tr><td>Agricultural Research Service (8042-31000-001-00-D)</td><td>Dr. Benjamin D. Rosen</td></tr></table>                                                                                                                                                                                                                                                                                                                                                                                                                                                                                                                                                                                                                                                                                                                                                                                                                                                                                                                                                                                                                                                                                                                                                                                            | National Institute of Food and Agriculture (2013-67015-21228) | Dr. Kim C. Worley | National Institute of Food and Agriculture (2013-67015-21372) | Dr. Noelle E. Cockett | National Institute of Food and Agriculture (2017-67016-26301) | Dr. Brenda M. Murdoch | International Sheep Genomics Consortium (217201191442) | Dr. Kim C. Worley | Agricultural Research Service (5090-31000-026-00-D) | Dr. Derek M. Bickhart | Agricultural Research Service (3040-31000-100-00D) | Dr. Timothy P.L. Smith | Agricultural Research Service (8042-31000-001-00-D) | Dr. Benjamin D. Rosen |
| National Institute of Food and Agriculture (2013-67015-21228) | Dr. Kim C. Worley                                                                                                                                                                                                                                                                                                                                                                                                                                                                                                                                                                                                                                                                                                                                                                                                                                                                                                                                                                                                                                                                                                                                                                                                                                                                                                                                                                                                                                                                                                                                                                                                                                                                                                                                                                                                                                                                                                                                                   |                                                               |                   |                                                               |                       |                                                               |                       |                                                        |                   |                                                     |                       |                                                    |                        |                                                     |                       |
| National Institute of Food and Agriculture (2013-67015-21372) | Dr. Noelle E. Cockett                                                                                                                                                                                                                                                                                                                                                                                                                                                                                                                                                                                                                                                                                                                                                                                                                                                                                                                                                                                                                                                                                                                                                                                                                                                                                                                                                                                                                                                                                                                                                                                                                                                                                                                                                                                                                                                                                                                                               |                                                               |                   |                                                               |                       |                                                               |                       |                                                        |                   |                                                     |                       |                                                    |                        |                                                     |                       |
| National Institute of Food and Agriculture (2017-67016-26301) | Dr. Brenda M. Murdoch                                                                                                                                                                                                                                                                                                                                                                                                                                                                                                                                                                                                                                                                                                                                                                                                                                                                                                                                                                                                                                                                                                                                                                                                                                                                                                                                                                                                                                                                                                                                                                                                                                                                                                                                                                                                                                                                                                                                               |                                                               |                   |                                                               |                       |                                                               |                       |                                                        |                   |                                                     |                       |                                                    |                        |                                                     |                       |
| International Sheep Genomics Consortium (217201191442)        | Dr. Kim C. Worley                                                                                                                                                                                                                                                                                                                                                                                                                                                                                                                                                                                                                                                                                                                                                                                                                                                                                                                                                                                                                                                                                                                                                                                                                                                                                                                                                                                                                                                                                                                                                                                                                                                                                                                                                                                                                                                                                                                                                   |                                                               |                   |                                                               |                       |                                                               |                       |                                                        |                   |                                                     |                       |                                                    |                        |                                                     |                       |
| Agricultural Research Service (5090-31000-026-00-D)           | Dr. Derek M. Bickhart                                                                                                                                                                                                                                                                                                                                                                                                                                                                                                                                                                                                                                                                                                                                                                                                                                                                                                                                                                                                                                                                                                                                                                                                                                                                                                                                                                                                                                                                                                                                                                                                                                                                                                                                                                                                                                                                                                                                               |                                                               |                   |                                                               |                       |                                                               |                       |                                                        |                   |                                                     |                       |                                                    |                        |                                                     |                       |
| Agricultural Research Service (3040-31000-100-00D)            | Dr. Timothy P.L. Smith                                                                                                                                                                                                                                                                                                                                                                                                                                                                                                                                                                                                                                                                                                                                                                                                                                                                                                                                                                                                                                                                                                                                                                                                                                                                                                                                                                                                                                                                                                                                                                                                                                                                                                                                                                                                                                                                                                                                              |                                                               |                   |                                                               |                       |                                                               |                       |                                                        |                   |                                                     |                       |                                                    |                        |                                                     |                       |
| Agricultural Research Service (8042-31000-001-00-D)           | Dr. Benjamin D. Rosen                                                                                                                                                                                                                                                                                                                                                                                                                                                                                                                                                                                                                                                                                                                                                                                                                                                                                                                                                                                                                                                                                                                                                                                                                                                                                                                                                                                                                                                                                                                                                                                                                                                                                                                                                                                                                                                                                                                                               |                                                               |                   |                                                               |                       |                                                               |                       |                                                        |                   |                                                     |                       |                                                    |                        |                                                     |                       |
| <b>Abstract:</b>                                              | <p><b>Background</b></p> <p>The domestic sheep (<i>Ovis aries</i>) is an important agricultural species raised for meat, wool, and milk across the world. A high-quality reference genome for this species enhances the ability to discover genetic mechanisms influencing biological traits. Further, a high-quality reference genome allows for precise functional annotation of gene regulatory elements. The rapid advances in genome assembly algorithms and emergence of sequencing technologies with increasingly long reads provide the opportunity for an improved de novo assembly of the sheep reference genome.</p> <p><b>Findings</b></p> <p>Short-read Illumina (55x coverage), long-read PacBio (75x coverage), and Hi-C data from this ewe retrieved from public databases were combined with an additional 50x coverage of Oxford Nanopore data and assembled with canu v1.9. The assembled contigs were scaffolded using Hi-C data with Salsa v2.2, gaps filled with PBSuite v15.8.24, and polished with Nanopolish v0.12.5. After duplicate contig removal with PurgeDups v1.0.1, chromosomes were oriented and polished with two rounds of a pipeline which consisted of freebayes v1.3.1 to call variants, Merfin to validate them, and BCFtools to generate the consensus fasta. The ARS-UI_Ramb_v2.0 assembly is 2.63 Gb in length and has improved continuity (contig NG50 of 43.18 Mb) with a 19-fold and 38-fold decrease in the number of scaffolds compared with Oar_rambouillet_v1.0 and Oar_v4.0. ARS-UI_Ramb_v2.0 has greater per-base accuracy and fewer insertions and deletions identified from mapped RNA sequence than previous assemblies.</p> <p><b>Conclusions</b></p> <p>The ARS-UI_Ramb_v2.0 assembly is a substantial improvement in contiguity that will optimize the functional annotation of the sheep genome and facilitate improved mapping accuracy of genetic variant and expression data for traits in sheep.</p> |                                                               |                   |                                                               |                       |                                                               |                       |                                                        |                   |                                                     |                       |                                                    |                        |                                                     |                       |
| <b>Corresponding Author:</b>                                  | Benjamin D Rosen<br><br>UNITED STATES                                                                                                                                                                                                                                                                                                                                                                                                                                                                                                                                                                                                                                                                                                                                                                                                                                                                                                                                                                                                                                                                                                                                                                                                                                                                                                                                                                                                                                                                                                                                                                                                                                                                                                                                                                                                                                                                                                                               |                                                               |                   |                                                               |                       |                                                               |                       |                                                        |                   |                                                     |                       |                                                    |                        |                                                     |                       |
| <b>Corresponding Author Secondary</b>                         |                                                                                                                                                                                                                                                                                                                                                                                                                                                                                                                                                                                                                                                                                                                                                                                                                                                                                                                                                                                                                                                                                                                                                                                                                                                                                                                                                                                                                                                                                                                                                                                                                                                                                                                                                                                                                                                                                                                                                                     |                                                               |                   |                                                               |                       |                                                               |                       |                                                        |                   |                                                     |                       |                                                    |                        |                                                     |                       |

|                                                                                                                                                                                                                                                                                                  |                                                                                                                                                                                                                                                                                |
|--------------------------------------------------------------------------------------------------------------------------------------------------------------------------------------------------------------------------------------------------------------------------------------------------|--------------------------------------------------------------------------------------------------------------------------------------------------------------------------------------------------------------------------------------------------------------------------------|
| <b>Information:</b>                                                                                                                                                                                                                                                                              |                                                                                                                                                                                                                                                                                |
| <b>Corresponding Author's Institution:</b>                                                                                                                                                                                                                                                       |                                                                                                                                                                                                                                                                                |
| <b>Corresponding Author's Secondary Institution:</b>                                                                                                                                                                                                                                             |                                                                                                                                                                                                                                                                                |
| <b>First Author:</b>                                                                                                                                                                                                                                                                             | Kimberly M Davenport, M.S.                                                                                                                                                                                                                                                     |
| <b>First Author Secondary Information:</b>                                                                                                                                                                                                                                                       |                                                                                                                                                                                                                                                                                |
| <b>Order of Authors:</b>                                                                                                                                                                                                                                                                         | Kimberly M Davenport, M.S.                                                                                                                                                                                                                                                     |
|                                                                                                                                                                                                                                                                                                  | Derek M. Bickhart                                                                                                                                                                                                                                                              |
|                                                                                                                                                                                                                                                                                                  | Kim C. Worley                                                                                                                                                                                                                                                                  |
|                                                                                                                                                                                                                                                                                                  | Shwetha C. Murali                                                                                                                                                                                                                                                              |
|                                                                                                                                                                                                                                                                                                  | Mazdak Salavati                                                                                                                                                                                                                                                                |
|                                                                                                                                                                                                                                                                                                  | Emily L. Clark                                                                                                                                                                                                                                                                 |
|                                                                                                                                                                                                                                                                                                  | Noelle E. Cockett                                                                                                                                                                                                                                                              |
|                                                                                                                                                                                                                                                                                                  | Michael P. Heaton                                                                                                                                                                                                                                                              |
|                                                                                                                                                                                                                                                                                                  | Timothy P.L. Smith                                                                                                                                                                                                                                                             |
|                                                                                                                                                                                                                                                                                                  | Brenda M. Murdoch                                                                                                                                                                                                                                                              |
|                                                                                                                                                                                                                                                                                                  | Benjamin D. Rosen                                                                                                                                                                                                                                                              |
| <b>Order of Authors Secondary Information:</b>                                                                                                                                                                                                                                                   |                                                                                                                                                                                                                                                                                |
| <b>Response to Reviewers:</b>                                                                                                                                                                                                                                                                    | Dear Hans,<br><br>Here is the manuscript updated to include the Oxford Nanopore sequence accession numbers (line 175), the updated BUSCO results (lines 321-328), and the GigaDB reference in the "Availability of supporting data" section (line 410).<br><br>Regards,<br>Ben |
| <b>Additional Information:</b>                                                                                                                                                                                                                                                                   |                                                                                                                                                                                                                                                                                |
| <b>Question</b>                                                                                                                                                                                                                                                                                  | <b>Response</b>                                                                                                                                                                                                                                                                |
| Are you submitting this manuscript to a special series or article collection?                                                                                                                                                                                                                    | No                                                                                                                                                                                                                                                                             |
| <b>Experimental design and statistics</b>                                                                                                                                                                                                                                                        | Yes                                                                                                                                                                                                                                                                            |
| Full details of the experimental design and statistical methods used should be given in the Methods section, as detailed in our <a href="#">Minimum Standards Reporting Checklist</a> . Information essential to interpreting the data presented should be made available in the figure legends. |                                                                                                                                                                                                                                                                                |
| Have you included all the information requested in your manuscript?                                                                                                                                                                                                                              |                                                                                                                                                                                                                                                                                |
| <b>Resources</b>                                                                                                                                                                                                                                                                                 | Yes                                                                                                                                                                                                                                                                            |

|                                                                                                                                                                                                                                                                                                                                                                                                                                                                                                                                                         |            |
|---------------------------------------------------------------------------------------------------------------------------------------------------------------------------------------------------------------------------------------------------------------------------------------------------------------------------------------------------------------------------------------------------------------------------------------------------------------------------------------------------------------------------------------------------------|------------|
| <p>A description of all resources used, including antibodies, cell lines, animals and software tools, with enough information to allow them to be uniquely identified, should be included in the Methods section. Authors are strongly encouraged to cite <a href="#">Research Resource Identifiers</a> (RRIDs) for antibodies, model organisms and tools, where possible.</p> <p>Have you included the information requested as detailed in our <a href="#">Minimum Standards Reporting Checklist</a>?</p>                                             |            |
| <p><b>Availability of data and materials</b></p> <p>All datasets and code on which the conclusions of the paper rely must be either included in your submission or deposited in <a href="#">publicly available repositories</a> (where available and ethically appropriate), referencing such data using a unique identifier in the references and in the “Availability of Data and Materials” section of your manuscript.</p> <p>Have you have met the above requirement as detailed in our <a href="#">Minimum Standards Reporting Checklist</a>?</p> | <p>Yes</p> |

1 **An improved ovine reference genome assembly to facilitate in depth functional annotation**  
2 **of the sheep genome**

3  
4 Kimberly M. Davenport<sup>1</sup> [0000-0003-2796-9252], Derek M. Bickhart<sup>2</sup> Bickhart [0000-0003-  
5 2223-9285], Kim Worley<sup>3</sup> [0000-0002-0282-1000], Shwetha C. Murali<sup>4</sup>, Mazdak Salavati<sup>5</sup>  
6 [0000-0002-7349-2451], Emily L. Clark<sup>6</sup> [0000-0002-9550-7407], Noelle E. Cockett<sup>7</sup>, Michael  
7 P. Heaton<sup>8</sup> [0000-0003-1386-1208], Timothy P.L. Smith<sup>9</sup> [0000-0003-1611-6828], Brenda M.  
8 Murdoch<sup>10\*</sup> [0000-0001-8675-3473], and Benjamin D. Rosen<sup>11\*</sup> [0000-0001-9395-8346]  
9

10 <sup>1</sup>Department of Animal, Veterinary, and Food Sciences, University of Idaho, 875 Perimeter Dr.,  
11 Moscow, ID, United States 83843. Email: [kmdavenport@uidaho.edu](mailto:kmdavenport@uidaho.edu)  
12

13 <sup>2</sup>US Dairy Forage Research Center, USDA-ARS, 1925 Linden Drive, Madison, WI, United  
14 States 53706. Email: [derek.bickhart@usda.gov](mailto:derek.bickhart@usda.gov)  
15

16 <sup>3</sup>Baylor College of Medicine, One Baylor Plaza, Houston, TX, United States 77030. Email:  
17 [kworley@bcm.edu](mailto:kworley@bcm.edu)  
18

19 <sup>4</sup>Baylor College of Medicine, One Baylor Plaza, Houston, TX, United States 77030.  
20 Email: [shwethac@gmail.com](mailto:shwethac@gmail.com)  
21

22 <sup>5</sup>The Roslin Institute, Royal (Dick) School of Veterinary Studies, The University of Edinburgh,  
23 Easter Bush Campus, Midlothian, United Kingdom, EH25 9RG, United Kingdom. Email:  
24 [mazdak.salavati@roslin.ed.ac.uk](mailto:mazdak.salavati@roslin.ed.ac.uk)  
25

26 <sup>6</sup>The Roslin Institute, Royal (Dick) School of Veterinary Studies, The University of Edinburgh,  
27 Easter Bush Campus, Midlothian, United Kingdom, EH25 9RG. Email:  
28 [emily.clark@roslin.ed.ac.uk](mailto:emily.clark@roslin.ed.ac.uk)  
29

30 <sup>7</sup>Utah State University, Old Main Hill, Logan, UT 84322. Email: [noelle.cockett@usu.edu](mailto:noelle.cockett@usu.edu)  
31

32 <sup>8</sup>US Meat Animal Research Center, USDA-ARS, State Spur 18D, Clay Center, NE 68933.  
33 Email: [mike.heaton@usda.gov](mailto:mike.heaton@usda.gov)  
34

35 <sup>9</sup>US Meat Animal Research Center, USDA-ARS, State Spur 18D, Clay Center, NE 68933.  
36 Email: [tim.smith2@usda.gov](mailto:tim.smith2@usda.gov)  
37

38 <sup>10</sup>Department of Animal, Veterinary, and Food Sciences, University of Idaho, 875 Perimeter Dr.,  
39 Moscow, ID 83843. Email: [bmurdoch@uidaho.edu](mailto:bmurdoch@uidaho.edu)  
40

41 <sup>11</sup>Animal Genomics and Improvement Laboratory, USDA-ARS, 10300 Baltimore Avenue,  
42 Beltsville, MD 20705. Email: [ben.rosen@usda.gov](mailto:ben.rosen@usda.gov)  
43

44 Correspondence:

45 Brenda M. Murdoch

46 [bmurdoch@uidaho.edu](mailto:bmurdoch@uidaho.edu)

47 Benjamin D. Rosen  
48 [ben.rosen@usda.gov](mailto:ben.rosen@usda.gov)  
49 **Abstract**

50

51 *Background*

52

53 The domestic sheep (*Ovis aries*) is an important agricultural species raised for meat, wool, and  
54 milk across the world. A high-quality reference genome for this species enhances the ability to  
55 discover genetic mechanisms influencing biological traits. Further, a high-quality reference  
56 genome allows for precise functional annotation of gene regulatory elements. The rapid advances  
57 in genome assembly algorithms and emergence of increasingly long sequence read length  
58 provide the opportunity for an improved *de novo* assembly of the sheep reference genome.

59

60

61 *Findings*

62

63 Short-read Illumina (55x coverage), long-read PacBio (75x coverage), and Hi-C data from this  
64 ewe retrieved from public databases were combined with an additional 50x coverage of Oxford  
65 Nanopore data and assembled with canu v1.9. The assembled contigs were scaffolded using Hi-  
66 C data with Salsa v2.2, gaps filled with PBSuitev15.8.24, and polished with Nanopolish v0.12.5.  
67 After duplicate contig removal with PurgeDups v1.0.1, chromosomes were oriented and polished  
68 with two rounds of a pipeline which consisted of freebayes v1.3.1 to call variants, Merfin to  
69 validate them, and BCFtools to generate the consensus fasta. The ARS-UI\_Ramb\_v2.0 assembly  
70 has improved continuity (contig N50 of 43.18 Mb) with a 19-fold and 38-fold decrease in the

71 number of scaffolds compared with Oar\_rambouillet\_v1.0 and Oar\_v4.0. ARS-UI\_Ramb\_v2.0  
72 has greater per-base accuracy and fewer insertions and deletions identified from mapped RNA  
73 sequence than previous assemblies.

74

75

76 *Conclusions*

77

78 The ARS-UI\_Ramb\_v2.0 assembly is a substantial improvement that will optimize the  
79 functional annotation of the sheep genome and facilitate improved mapping accuracy of genetic  
80 variant and expression data for traits in sheep.

81

82

83 **Keywords:** Rambouillet, genome assembly, reference genome, sheep

84

85

86

87

88

89

90

91

92

93

94

95 **Context**

96

97 The domestic sheep (*Ovis aries*) is a globally important livestock species raised for a variety of  
98 purposes including meat, wool, and milk. Domestication likely occurred in multiple events  
99 approximately 11,000 years ago [1-4]. Selection for desirable traits including meat, wool, and  
100 milk began approximately 4,000-5,000 years ago [2,4]. Modern sheep breeds exhibit a wide  
101 variety of phenotypes and adaptations to specific environments, for example the enhanced  
102 parasite tolerance evident in hair sheep [5,6]. As many as 1,400 breeds of sheep exist today [7-9]  
103 including the Rambouillet breed developed in France from a Merino fine wool lineage that is  
104 regarded for its ability to produce high quality wool as well as meat products in production  
105 systems across the world [10,11].

106

107 Genome research in sheep holds promise to improve efficiency and sustainability of production  
108 and reduce the environmental effects of animal agriculture [12]. The first sheep reference  
109 genome assembly was based on whole genome shotgun (WGS) short-read sequencing,  
110 scaffolded by genetic linkage and radiation hybrid maps. The sequence came from two unrelated  
111 Texel breed sheep, with the first assembly draft (Oar\_v3.1; International Sheep Genomics  
112 Consortium, 2010) having a contig N50 of 40 kilobases (kb) and the update (Oar\_v4.0) [13]  
113 boosting the N50 metric to 150 kb. More recently, the Ovine Functional Annotation of Animal  
114 Genomes (FAANG) project proposed to perform a variety of genome annotation assays for  
115 dozens of tissues from a single animal [14,15]. To maximize the success of assays that depend on  
116 mapping sequence data to a reference, the FAANG project assembled the genome of that animal,

117 a female of the Rambouillet breed. The assembly, released in 2017 (Oar\_rambouillet\_v1.0,  
118 GenBank accession GCF\_002742125; Worley et al., unpublished) is based on a combination of  
119 Pacific Biosciences RSII WGS long-read and Illumina short-read sequencing. It has an improved  
120 contig N50 of 2.6 megabases (Mb) and is generally regarded as the official reference assembly  
121 for global sheep research.

122

123 The continued maturation of long read sequencing technologies provided an opportunity to  
124 improve upon the sheep reference genome assembly. Since most of the proposed FAANG  
125 annotation assays had already been performed on the Rambouillet ewe, lung tissue from the  
126 same animal was chosen for DNA extraction. This allowed the use of existing long read data to  
127 supplement new, longer-read, Oxford Nanopore PromethION sequencing. We report a *de novo*  
128 assembly of the same Rambouillet ewe used for Oar\_rambouillet\_v1.0, based on approximately  
129 50x coverage of nanopore reads (N50 47kb) and 75x coverage PacBio reads (N50 13kb). The  
130 new assembly, ARS-UI\_Ramb\_v2.0 offers a 20-fold improvement in contiguity and increased  
131 accuracy, providing a basis for regulatory element annotation in the FAANG project and  
132 facilitating the discovery of biological mechanisms that influence traits important in global sheep  
133 research and production.

134

135

## 136 **Methods**

137

138 *Sampling Strategy*

139



140 The fullblood Rambouillet ewe used for this genome assembly (Benz 2616, USMARC ID  
141 200935900) (Figure 1) was selected by the Ovine Functional Annotation of Animal Genomes  
142 project and acquired from the USDA. Tissues were collected postmortem from the healthy six-  
143 year-old ewe as approved by the Utah State University Institutional Animal Care and Use  
144 Committee. A full description of the tissue collection strategy is available in the FAANG Data  
145 Coordination Center [15,16]. Details regarding the tissues collected from the animal are available  
146 under BioSample number SAMEG329607 [17].

147

148

#### 149 *Sequencing and Data Acquisition*

150

151 DNA was extracted from approximately 50 mg of lung tissue using phenol:chloroform-based  
152 method as described [18]. Briefly, the frozen tissue was pulverized in a cryoPREP CP02 tissue  
153 disruption system (Covaris Inc., Woburn MA) as recommended by the manufacturer. The  
154 powdered tissue was transferred to a 50 mL conical tube and mixed in 200  $\mu$ L of phosphate  
155 buffered saline (Sigma-Aldrich, St. Louis MO). The tissue was then diluted in 10 mL of buffer  
156 TLB (100mM NaCl, 10mM Tris-HCl pH 8.0, 25 mM EDTA, 0.5% SDS) and mixed by  
157 vortexing, then incubated with 20  $\mu$ L 10 mg/mL RNase A at 37°C for one hour with gentle  
158 shaking. Protein digestion was performed with 100  $\mu$ L Proteinase K (20 mg/mL) at 50°C for 2  
159 hours, with slow rotation of the tube to mix every 30 minutes. The lysate was distributed equally  
160 into two 15 mL Phase Lock tubes (Quantabio, Beverly MA) and each tube received 5 mL of TE-  
161 saturated Phenol (Sigma-Aldrich, St. Louis MO) followed by mixing on a tube rotator at 20  
162 RPM for 10 minutes at 22°C. The aqueous layer was collected after separating at 2300xg for 10

Commented [HZ1]: = Logsdon 2019 ?

163 minutes and transferred to another Phase Lock tube. A second extraction performed in the same  
164 way as the first was conducted using 2.5 mL phenol and 2.5 mL chloroform:isoamyl alcohol  
165 (Sigma). The final aqueous phase was transferred to a 50 mL conical tube and the DNA  
166 precipitated with 2 mL of 5M ammonium acetate and 15 mL of ice-cold 100% ethanol. The  
167 DNA was pulled from the alcohol using a Pasteur pipet “hook” and placed in 10 mL of cold 70%  
168 ethanol to wash the pellet. The ethanol was poured off and the DNA pellet dried for 20-30  
169 minutes, then dissolved in a dark drawer at room temperature for 48 hours in 1 mL of 10mM  
170 Tris-Cl pH 8.5. Library preparation for Oxford Nanopore long read sequencing was performed  
171 with an LSK-109 template preparation kit as recommended by the manufacturer (Oxford  
172 Nanopore, Oxford U.K.) with modifications as described by Logsdon [18]. The ligated template  
173 was sequenced with a PromethION instrument using four R9.4 flow cells. (Oxford Nanopore  
174 Technologies, Oxford, United Kingdom). Output as fast5 files were basecalled with Guppy v3.1  
175 [19]. Fastq files are available under the Sequence Read Archive (SRA) accessions  
176 SRR17080040-SRR17080043.

177  
178 Sequence data used in the previous Oar\_rambouillet\_v1.0 assembly was retrieved from the SRA  
179 listed under project number PRJNA414087 [15]. PacBio RS II sequence generated from DNA  
180 extracted from whole blood was retrieved from SRX3445660, SRX3445661, SRX3445662, and  
181 SRX3445663. The Hi-C sequence data generated from liver using HindIII enzyme and  
182 sequenced at 150 bp paired end with an Illumina HiSeq X Ten was retrieved from SRX3399085  
183 and SRX3399086. Short read whole genome sequencing from DNA extracted from whole blood  
184 collected from the Rambouillet ewe was performed with an Illumina HiSeq X Ten sequenced at  
185 150 bp paired end and was retrieved from SRX3405602. Further details about these sequences

186 can be found under the umbrella project number PRJNA414087. Short read 45 bp paired end  
187 whole genome sequence from an Illumina Genome Analyzer II generated from Texel sheep used  
188 in previous genome assemblies were retrieved from the SRA under accessions SRX511533-  
189 SRX511565 (BioProject PRJNA169880).

190

191

#### 192 *Assembly*

193

194 Contigs were assembled with Oxford Nanopore and PacBio reads generated as described above  
195 using canu v1.8 (Canu, RRID:SCR\_015880) through the trimmed reads stage of assembly.

196 Parameters for contig construction were set as “batOptions=-dg 4 -db 4 -mo 1000” [20]. Canu

197 v1.9 was used to complete the contig assembly because this update demonstrates better

198 consensus generation of the overlapped contigs in the final step in the assembly process [21,22].

199 The corrected error rate option was set as “correctedErrorRate=0.105.”

200

201

#### 202 *Scaffolding*

203

204 Two Hi-C datasets from liver tissue from two different library preparations were retrieved as

205 described above. The Hi-C reads were first aligned to the polished contigs using the Arima

206 Genomics mapping pipeline [23]. This pipeline first maps paired end reads individually with

207 bwa-mem, then removes the 3' end of reads identified as chimeric and span ligation junctions.

208 Reads were then paired, filtered by mapping quality with samtools [24], and PCR duplicates

209 removed with Picard [25]. The two Hi-C libraries were merged in the final step in the Arima  
210 pipeline to generate the merged BAM file. The BAM file was converted to a BED file for input  
211 into Salsa using the bedtools command bamToBed (BEDTools, RRID:SCR\_006646) [26]. Salsa  
212 v2.2 was used for scaffolding by implementing “python run\_pipeline.py -a contigs.fasta -l  
213 contigs.fasta.fai -b alignment.bed -e HindIII -o scaffolds -m yes” [27].

214  
215 The Hi-C reads were aligned to the scaffolded assembly with the Arima Genomics mapping  
216 pipeline and then processed with PretextView to visually evaluate the scaffolds as a contact map  
217 in PretextView [28]. The scaffolded assembly was also compared to *Oar\_rambouillet\_v1.0* by  
218 aligning the two genomes with “minimap2 -cx asm5 Oar\_rambouillet\_v1.0\_genomic.fasta  
219 scaffolds.fasta > alignment.paf” [29]. A dotplot of the alignment was visualized with D-Genies  
220 [30]. Scaffolds were edited based on visual inspection of the contact map and dotplot, as well as  
221 the Hi-C alignment file. Scaffold joins and rearrangements were incorporated to the assembly  
222 using the *agp2fasta* mode of CombineFasta [31].

223

224

### 225 *Gap Filling and Polishing*

226

227 Gap filling was completed with pbsuite v15.8.24 using both the PacBio and Oxford Nanopore  
228 reads. Nanopolish v0.12.5 (Nanopolish, RRID:SCR\_016157) [32] with the NanoGrid parallel  
229 wrapper [33] was employed with the raw fast5 files generated from the PromethION sequencing  
230 to polish the assembly. Duplicates were removed using PurgeDups v1.0.1 [34]. The chromosome  
231 orientation was confirmed in the polished assembly by identifying telomeres and centromeres

232 using RepeatMasker v4.1.1 (**RepeatMasker**, RRID:SCR\_012954) [35]. The mitochondrial genome  
233 was identified by aligning the previously annotated mitochondrial sequence from  
234 Oar\_rambouillet\_v1.0 (RefSeq NC\_001941.1) to the assembly contigs. Chromosomes were  
235 oriented centromere to telomere and placed in chromosome number order. The final polishing  
236 was performed with two rounds of freebayes v1.3.1 (**FreeBayes**, RRID:SCR\_010761) using the  
237 Illumina short read data after final chromosome orientations and mitochondrial genome were  
238 confirmed [36]. Variants used for polishing with both Nanopolish and freebayes were screened  
239 with Merfin [37] which evaluates the k-mer consequences of variant calls and filters unsupported  
240 variants.

241

242

#### 243 *RNA Sequencing*

244

245 RNA sequencing data was generated from five tissues including skin, thalamus, pituitary, lymph  
246 node (mesenteric), and abomasum pylorus collected from the animal used to assemble the  
247 reference genome. Details regarding the RNA isolation protocol, library preparation, and  
248 sequencing as well as the raw data can be found in GenBank under BioProject PRJEB35292,  
249 specifically under SRA run numbers ERR3665717 (skin), ERR3728435 (thalamus),  
250 ERR3650379 (pituitary), ERR3665711 (lymph node mesenteric), and ERR3650373 (abomasum  
251 pylorus). Reads were trimmed with Trim Galore v0.6.4 [38] and alignment to both Rambouillet  
252 genomes was performed with STAR v2.7 using default parameters [39]. Indels were identified  
253 with bcftools mpileup, filtering allele depth (AD) at  $> 5$  [40].

254

255

256 **Annotation**

257 The annotation for ARS-UI\_Ramb\_v2.0, NCBI Ovis aries Annotation Release 104, is available  
258 in RefSeq and other NCBI genome resources [41].

259

260 Here we also provide a liftover of the annotation for Oar\_rambouillet\_v1.0 onto ARS-  
261 UI\_Ramb\_v2.0. The annotation used for the liftover was NCBI v103  
262 GCF\_002742125.1\_Oar\_rambouillet\_v1.0\_genomic.fna.gz. The GFF3 format gene annotation  
263 file was prepared for processing using liftOff v1.5.2 [42]. A set of matching chromosome names  
264 for Oar\_rambouillet\_v1.0 and ARS-UI\_Ramb\_v2.0 were generated according to the instructions  
265 for liftOff (*paste -d " " <(cut -d ' ' -f1 ramb1.chr) <(cut -d ' ' -f1 ramb2.chr) > chroms.txt*). The  
266 GFF file (annotation Ramb1LO2) generated by liftOff is included in Supplementary File 1  
267 (Ramb\_v1.0\_NCBI103\_lifted\_over\_ARS-UI\_Ramb\_v2.0.gff.gz).

268

269 To compare the breakdown of transcripts captured by the three annotations  
270 (Oar\_Rambouillet\_v1.0, Ramb1LO2 (liftover) and ARS-UI\_Ramb\_v2.0), we generated  
271 transcript expression estimates using Kallisto v0.44.0 (kallisto, RRID:SCR\_016582) [43]. For  
272 the lifted over gene annotation the GFF file (Ramb\_v1.0\_NCBI103\_lifted\_over\_ARS-  
273 UI\_Ramb\_v2.0.gff.gz) was used to generate transcriptome sequence FASTA files, as a Kallisto  
274 index, for transcript expression estimation. Briefly, exonic blocks were extracted from the GFF3  
275 file using the awk command (*awk '(\$3~/exon/)' input.gff*). The getfasta and groupby plugins  
276 from bedtools v2.30.0 [44] were used to extract the exonic sequences and group them by  
277 transcript name. Exonic sequences for each transcript were appended in the correct order, to

278 produce the complete sequence for each transcript. The FASTA format file for the whole  
279 transcriptome was created using all of the transcript level FASTA sequences for the liftover  
280 annotation Ramb1LO2 (Supplementary File 2; Ramb1LO2\_NCBI103\_geneBank\_rna.fa). The  
281 set of scripts used for this step are included in Supplementary File 3. The Kallisto indices for  
282 Oar\_Rambouillet\_v1.0 (GCF\_002742125.1\_Oar\_rambouillet\_v1.0\_rna.fna.gz), Ramb1LO2  
283 (liftover; Ramb1LO2\_NCBI103\_geneBank\_rna.fa) and ARS-UI\_Ramb\_v2.0  
284 (GCF\_016772045.1\_ARS-UI\_Ramb\_v2.0\_rna.fna.gz) were then used with the RNA-Seq data  
285 from the 61 tissues from Benz2616 (GenBank BioProject PRJNA414087 and PRJEB35292) to  
286 estimate transcript level expression for every tissue as transcript per million mapped reads  
287 (TPM) and compared across the three annotations.

288

289

## 290 **Data Validation and Quality Control**

291

### 292 *Assembly Quality Statistics*

293

294 The four flow cells of PromethION data produced 136 gigabases (Gb) of WGS sequence  
295 (approximately 51x coverage) in reads having a read N50 of 47 kb. The initial generation of  
296 contigs used this data as well as 198.1 Gb of RSII data with a read N50 of 12.9 kb. The ARS-  
297 UI\_Ramb\_v2.0 assembly was submitted to NCBI GenBank under accession number  
298 GCF\_016772045.1, and statistics of contigs and scaffolds following initial polishing, scaffolding  
299 with Hi-C data and manual editing, gap-filling, and final polishing, are shown in Table 1. The  
300 assembly improved on the Oar\_v4.0/Oar\_rambouillet\_v1.0 sheep reference assemblies in all

301 continuity measures (Table 1) including a 286/17-fold increase in contig N50 (the size of the  
302 shortest contig for which all larger contigs contain half of the total assembly), a 214/33-fold  
303 reduction in the number of contigs in the assembly and concomitant 209/13-fold reduction of  
304 contig L50 (the number of contigs making up half of the total assembly), and 38/19-fold  
305 reduction in total number of scaffolds. Manual curation of scaffolds using Hi-C data improved  
306 scaffold continuity and led to chromosome length scaffolds (Figure 2).

307  
308 The Themis-ASM pipeline [45] was implemented to further assess assembly quality and  
309 compare sheep genome assemblies. Short read sequence from both the Rambouillet ewe used in  
310 this assembly and Texel sheep from previous sheep genome assemblies were used to compare  
311 ARS-UI\_Ramb\_v2.0 with Oar\_rambouillet\_v1.0 and Oar\_v4.0 assemblies.

312  
313 The k-mer based quality value and error rates improved with ARS-UI\_Ramb\_v2.0 compared  
314 with Oar\_rambouillet\_v1.0 and Oar\_v4.0. This is also reflected in the proportion of complete  
315 assembly based on k-mers (merCompleteness), which is similar between ARS-UI\_Ramb\_v2.0  
316 and Oar\_rambouillet\_v1.0 and both are higher than Oar\_v4.0. Further, the SNP and indel quality  
317 value (baseQV) were greatest overall in ARS-UI\_Ramb\_v2.0 (41.84), followed by  
318 Oar\_rambouillet\_v1.0 (40.69) and Oar\_v4.0 (32.40). The percentage of short reads not mapped  
319 to the genome was  $\leq 1\%$  in all three assemblies.

320  
321 The completeness of ARS-UI\_Ramb\_v2.0 was evaluated by examining the presence or absence  
322 of evolutionarily conserved genes in each assembly using Benchmarking Universal Single-Copy  
323 Ortholog (BUSCO, RRID:SCR\_015008)) v5.2.2 scores with the cetartiodactyla\_odb10 dataset



324 and metaeuk gene predictor [46]. The percent of single copy complete BUSCOs were higher  
325 (93.9%) in ARS-UI\_Ramb\_v2.0 when compared with Oar\_rambouillet\_v1.0 (93.0%) and  
326 Oar\_v4.0 (91.2%). Complete duplicated BUSCO percentage was highest in  
327 Oar\_rambouillet\_v1.0 (2.6%) compared with ARS-UI\_Ramb\_v2.0 (2.1%), and lowest in  
328 Oar\_v4.0 (1.6%). Further, ARS-UI\_Ramb\_v2.0 had the lowest percent of fragmented and  
329 missing BUSCOs (0.9% and 3.1%, respectively) compared with Oar\_rambouillet\_v1.0 (1.1%  
330 and 3.3%, respectively) and Oar\_v4.0 (2.4% and 4.8%, respectively).

331  
332 The three sheep genome assemblies were also compared with a feature response curve in which  
333 the quality of the assembly is analyzed as a function of the features, or maximum number of  
334 possible errors, allowed in the contigs (Figure 3) [47]. Both the ARS-UI\_Ramb\_v2.0 and  
335 Oar\_v4.0 feature response curves peak higher and to the left of Oar\_rambouillet\_v1.0, which  
336 indicate fewer errors in these assemblies (Figure 3A). The ARS-UI\_Ramb\_v2.0 genome also has  
337 fewer regions with either low or high coverage overall and for paired reads, suggesting fewer  
338 coverage issues, as well as fewer improperly paired or unmapped single reads when compared  
339 with other assemblies (Figure 3B). The number of high Comp/Expansion (CE) statistics in ARS-  
340 UI\_Ramb\_v2.0 was intermediate between Oar\_rambouillet\_v1.0 (higher) and Oar\_v4.0 (lower),  
341 however this latest assembly had the lowest number of regions with low CE statistics.

342  
343 Comparative alignment of ARS-UI\_Ramb\_v2.0 with previous assemblies Oar\_rambouillet\_v1.0  
344 and Oar\_v4.0 and visualization with a dotplot revealed a high amount of agreement between  
345 assemblies (Figure 4). Interestingly, chromosome 11 was improperly oriented in  
346 Oar\_rambouillet\_v1.0, and after confirming centromere and telomere locations on this

347 chromosome, this was resolved in the ARS-UI\_Ramb\_v2.0 assembly. The percent identity  
348 between ARS-UI\_Ramb\_v2.0 is very high when compared with Oar\_rambouillet\_v1.0 which  
349 was expected considering the same animal was used in both assemblies. However, Oar\_v4.0 was  
350 assembled from Texel sheep, which is apparent in the percent identity in the dotplot.

351

352 In summary, ARS-UI\_Ramb\_v2.0 offers greater contiguity, improved quality, more complete  
353 BUSCOs, and fewer assembly errors when compared with previous assemblies.

354

355

356 *RNA sequencing alignment*

357

358 Insertions and deletions (indels) in the ARS-UI\_Ramb\_v2.0 assembly were characterized and  
359 compared with Oar\_rambouillet\_v1.0 by mapping 150 bp paired-end RNA-seq data from skin,  
360 thalamus, pituitary, lymph node (mesenteric), and abomasum pylorus generated from the same  
361 animal used to assemble the reference genome. In all five tissues, ARS-UI\_Ramb\_v2.0 had  
362 nearly half of the number of indels compared with Oar\_rambouillet\_v1.0. Most indels identified  
363 in both assemblies were 1bp in length. The ARS-UI\_Ramb\_v2.0 had a greater number of  
364 uniquely mapped reads in each tissue when compared with Oar\_rambouillet\_v1.0, leading to an  
365 approximate 2% increase in the percent of uniquely mapped reads in most tissues except  
366 pituitary, which saw an almost 13% improvement. The number of reads that mapped to multiple  
367 loci decreased in the new assembly by 12.59% in pituitary, and 1-2% in other tissues. Further,  
368 ARS-UI\_Ramb\_v2.0 had fewer unmapped reads than Oar\_rambouillet\_v1.0 across all five  
369 tissues by an average of 0.15%.

370

371 *Annotation*

372

373 The ARS-UI\_Ramb\_v2.0 annotation represents a substantial improvement over the annotation  
374 on Oar\_rambouillet\_v1.0. For example, for ARS-UI\_Ramb\_v2.0 16,500 coding genes have an  
375 ortholog to human (compared to 16,319 for Oar\_rambouillet\_v1.0), and the BUSCO scores  
376 demonstrate that 99.1% of the gene models (cetartiodactyla\_odb10) are complete in the new  
377 annotation versus 98.8% in the previous one. The annotation for ARS-UI\_Ramb\_v2.0 includes  
378 Iso-Sequencing for 8 tissues to improve contiguity of gene models, and CAGE sequencing for 56  
379 tissues to define TSS, that were not used to annotate Oar\_rambouillet\_v1.0. The full report for  
380 the annotation release is available at:

381 ([https://www.ncbi.nlm.nih.gov/genome/annotation\\_euk/Ovis\\_aries/104](https://www.ncbi.nlm.nih.gov/genome/annotation_euk/Ovis_aries/104)).

382

383 Using Kallisto we compared the number of expressed transcripts, for the RNA-Seq dataset of 61  
384 tissue samples from Benz2616, across the three annotations (Oar\_Rambouillet\_v1.0, RambILO2  
385 (liftover) and ARS-UI\_Ramb\_v2.0). There was a considerable increase in the number of  
386 transcripts captured by the annotation for ARS-UI\_Ramb\_v2.0 (60,064) relative to  
387 Oar\_Rambouillet\_v1.0 (42,058) and the liftover annotation (RambILO2) (40,910) (Figure 5).  
388 This equates to approximately 20,000 new annotated gene models for ARS-UI\_Ramb\_v2.0 and  
389 further reflects the substantial improvement over the annotation for Oar\_Rambouillet\_v1.0.

390 The lifted over annotation we have generated will provide a resource for those who wish to  
391 compare their results for ARS-UI\_Ramb\_v2.0 to previous work using

392 Oar\_Rambouillet\_v1.0. Only 2.7% of protein coding transcripts were lost (1148) lifting over the

393 annotation for Oar\_Rambouillet\_v1.0 onto ARS-UI\_Ramb\_v2.0. According to the annotation  
394 report provided by NCBI  
395 ([https://www.ncbi.nlm.nih.gov/genome/annotation\\_euk/Ovis\\_aries/104/](https://www.ncbi.nlm.nih.gov/genome/annotation_euk/Ovis_aries/104/)), 70% of the annotations  
396 were identical or had only minor changes between and Oar\_Rambouillet\_v1.0 and ARS-  
397 UI\_Ramb\_v2.0.

398

399

#### 400 **Re-use potential**

401

402 The ARS-UI\_Ramb\_v2.0 genome assembly serves as a reference for genetic investigation of  
403 traits important in sheep research and production across the world. This genome is assembled  
404 from the same animal used in the Ovine FAANG Project, which provides a high-quality basis for  
405 epigenetic annotation to serve the international sheep genomics community and scientific  
406 community at large.

407

408

#### 409 **Availability of supporting data**

410

411 The data sets supporting the results of this article are available in the RefSeq repository,  
412 GCF\_016772045.1, and in the GigaScience Database [50]. RNA sequencing data is available  
413 under BioProject PRJEB35292. Ovis aries Annotation Release 104 is also available in RefSeq  
414 and other NCBI genome resources [41].

415

416

**417 Additional files**

418 Supplementary File 1 – Ramb\_v1.0\_NCBI103\_lifted\_over\_ARS-UI\_Ramb\_v2.0.gff.gz

419 Supplementary File 2 – Ramb1LO2\_NCBI103\_geneBank\_rna.fa

420 Supplementary File 3 – Supplementary\_File\_3\_scripts.txt

421

422

**423 Author contributions**

424

425 BMM, TPLS, DMB, and BDR conceptualized the study. BMM, NEC, MPH, and TPLS selected

426 the animal and collected samples. KW and SCM facilitated the generation of RSII, short read,

427 and Hi-C data. TPLS facilitated the nanopore long read data generation. KMD, DMB, TPLS,

428 BMM, and BDR performed the genome assembly, scaffolding, RNA-sequencing alignment,

429 polishing, and quality control. MS and ELC contributed the section describing the LiftOff

430 annotation and comparative analysis of transcript expression estimates for the three annotations.

431 KMD, DMB, TPLS, BMM, and BDR generated tables and figures and drafted the manuscript.

432 KMD, DMB, KW, SCM, NEC, TPLS, BMM, and BDR edited the manuscript. All authors

433 contributed to the article and approved the final version.

434

435

**436 Acknowledgements**

437

438 The authors thank Dr. Kristen Kuhn for technical support and Dr. Kreg Leymaster for overseeing  
439 the acquisition, animal care and housing, and interstate transportation of the Rambouillet ewe.

440

441

442 **Funding**

443

444 Funding was provided by Agriculture and Food Research Initiative Competitive grants from the  
445 USDA National Institute of Food and Agriculture supporting improvements of the sheep  
446 genomes (2013-67015-21228) and FAANG activities (2013-67015-21372, 2017-67016-26301).

447 Additional funding was received from the International Sheep Genome Consortium  
448 (217201191442) and infrastructure support from a grant to R. Gibbs from the NIH NHGRI  
449 Large-Scale Sequencing Program (U54 HG003273).

450

451 DMB was supported by appropriated USDA CRIS project 5090-31000-026-00-D. TPLS was  
452 supported by appropriated USDA CRIS Project 3040-31000-100-00D. BDR was supported by  
453 appropriated USDA CRIS Project 8042-31000-001-00-D. The USDA does not endorse any  
454 products or services. Mentioning of trade names is for information purposes only. The USDA is  
455 an equal opportunity employer.

456

457

458 **References**

459

- 460 1. Pedrosa S, Uzun M, Arranz JJ, Gutiérrez-Gil B, San Primitivo F, Bayón Y. Evidence of three  
461 maternal lineages in Near Eastern sheep supporting multiple domestication events. *Proc Biol*  
462 *Sci.* 2005;272:2211-7.
- 463
- 464 2. Zeder MA. Domestication and early agriculture in the Mediterranean Basin: origins,  
465 diffusion, and impact. *Proc Natl Acad Sci USA.* 2008;105:11597-604.
- 466
- 467 3. Chessa B, Pereira F, Arnaud F, Amorim A, Goyache F, Mainland I, Kao RR, Pemberton JM,  
468 Beraldi D, Stear MJ, Alberti A, Pittau M, Iannuzzi L, Banabazi MH, Kazwala RR, Zhang  
469 YP, Arranz JJ, Ali BA, Wang Z, Uzun M, Dione MM, Olsaker I, Holm LE, Saarma U,  
470 Ahmad S, Marzanov N, Eythorsdottir E, Holland MJ, Ajmone-Marsan P, Bruford MW,  
471 Kantanen J, Spencer TE, Palmarini M. Revealing the history of sheep domestication using  
472 retrovirus integrations. *Science.* 2009;324:532-6.
- 473
- 474 4. Kijas JW, Lenstra JA, Hayes B, Boitard S, Porto Neto LR, San Cristobal M, Servin B,  
475 McCulloch R, Whan V, Gietzen K, Paiva S, Barendse W, Ciani E, Raadsma H, McEwan J,  
476 Dalrymple B, International Sheep Genomics Consortium Members. Genome-wide analysis  
477 of the world's sheep breeds reveals high levels of historic mixture and strong recent selection.  
478 *PLoS Biol.* 2012;doi:10.1371/journal.pbio.1001258.
- 479
- 480 5. Burke JM, Miller JE. Relative resistance of Dorper crossbred ewes to gastrointestinal  
481 nematode infection compared with St. Croix and Katahdin ewes in the southeastern United  
482 States. *Vet Parasitol.* 2002;109:265-75.

- 483
- 484 6. Bowdridge SA, Zajac AM, Notter DR. St. Croix sheep produce a rapid and greater cellular  
485 immune response contributing to reduced establishment of *Haemonchus contortus*. *Vet*  
486 *Parasitol.* 2015;208:204-10.
- 487
- 488 7. Scherf BD. World watch list for domestic animal diversity. 3<sup>rd</sup> ed. Rome: Food and  
489 Agriculture Organization of the United Nations; 2000.
- 490
- 491 8. Lv FH, Agha S, Kantanen J, Colli L, Stucki S, Kijas JW, Joost S, Li MH, Ajmone Marsan P.  
492 Adaptations to climate-mediated selective pressures in sheep. *Mol Biol Evol.* 2014;31:3324-  
493 43.
- 494
- 495 9. Cao YH, Xu SS, Shen M, Chen ZH, Gao L, Lv FH, Xie XL, Wang XH, Yang H, Liu CB,  
496 Zhou P, Wan PC, Zhang YS, Yang JQ, Pi WH, Hehua E, Berry DP, Barbato M,  
497 Esmailizadeh A, Nosrati M, Salehian-Dehkordi H, Dehghani-Qanatqestani M, Dotsev AV,  
498 Deniskova TE, Zinovieva NA, Brem G, Štěpánek O, Ciani E, Weimann C, Erhardt G,  
499 Mwacharo JM, Ahbara A, Han JL, Hanotte O, Miller JM, Sim Z, Coltman D, Kantanen J,  
500 Bruford MW, Lenstra JA, Kijas J, Li MH. Historical Introgression from Wild Relatives  
501 Enhanced Climatic Adaptation and Resistance to Pneumonia in Sheep. *Mol Biol Evol.*  
502 2021;38:838-55.
- 503
- 504 10. Dickinson WF, Lush JL. Inbreeding and the genetic history of the Rambouillet sheep in  
505 America. *J Hered.* 1933;24:19-33.



- 506
- 507 11. Zhang L, Mousel MR, Wu X, Michal JJ, Zhou X, Ding B, Dodson MV, El-Halawany NK,  
508 Lewis GS, Jiang Z. Genome-wide genetic diversity and differentially selected regions among  
509 Suffolk, Rambouillet, Columbia, Polypay, and Targhee sheep. *PLoS One*. 2013;doi:  
510 10.1371/journal.pone.0065942.
- 511
- 512 12. Rexroad C, Vallet J, Matukumalli LK, Reecy J, Bickhart D, Blackburn H, Boggess M, Cheng  
513 H, Clutter A, Cockett N, Ernst C, Fulton JE, Liu J, Lunney J, Neiberghs H, Purcell C, Smith  
514 TPL, Sonstegard T, Taylor J, Telugu B, Eenennaam AV, Tassell CPV, Wells K. Genome to  
515 Phenome: Improving Animal Health, Production, and Well-Being - A New USDA Blueprint  
516 for Animal Genome Research 2018-2027. *Front Genet*. 2019;10:327.
- 517
- 518 13. Jiang Y, Xie M, Chen W, Talbot R, Maddox JF, Faraut T, Wu C, Muzny DM, Li Y, Zhang  
519 W, Stanton JA, Brauning R, Barris WC, Hourlier T, Aken BL, Searle SMJ, Adelson DL,  
520 Bian C, Cam GR, Chen Y, Cheng S, DeSilva U, Dixen K, Dong Y, Fan G, Franklin IR, Fu S,  
521 Guan R, Highland MA, Holder ME, Huang G, Ingham AB, Jhangiani SN, Kalra D, Kovar  
522 CL, Lee SL, Liu W, Liu X, Lu C, Lv T, Mathew T, McWilliam S, Menzies M, Pan S,  
523 Robelin D, Servin B, Townley D, Wang W, Wei B, White SN, Yang X, Ye C, Yue Y, Zeng  
524 P, Zhou Q, Hansen JB, Kristensen K, Gibbs RA, Flicek P, Warkup CC, Jones HE, Oddy VH,  
525 Nicholas FW, McEwan JC, Kijas J, Wang J, Worley KC, Archibald AL, Cockett N, Xu X,  
526 Wang W, Dalrymple BP. The sheep genome illuminates biology of the rumen and lipid  
527 metabolism. *Science*. 2014;344:1168-1173.
- 528

- 529 14. Murdoch BM. The functional annotation of the sheep genome project. *J Anim Sci.*  
530 2019;97:16.  
531
- 532 15. Salavati M, Caulton A, Clark R, Gazova I, Smith TPL, Worley KC, Cockett NE, Archibald  
533 AL, Clarke SM, Murdoch BM, Clark EL. Global Analysis of Transcription Start Sites in the  
534 New Ovine Reference Genome (*Oar rambouillet v1.0*). *Front Genet.* 2020;11:580580.  
535
- 536 16. FAANG Data Coordination Center. 2016.  
537 [https://data.faang.org/api/fire\\_api/samples/USU\\_SOP\\_Ovine\\_Benz2616\\_Tissue](https://data.faang.org/api/fire_api/samples/USU_SOP_Ovine_Benz2616_Tissue)  
538 [\\_Collection\\_20160426.pdf](https://data.faang.org/api/fire_api/samples/USU_SOP_Ovine_Benz2616_Tissue).  
539
- 540 17. European Bioinformatics Institute, BioSample SAMEG329607. 2016.  
541 <https://www.ebi.ac.uk/biosamples/samples/SAMEG329607>.  
542
- 543 18. Logsdon G. HMW gDNA purification and ONT ultra-long-read data generation  
544 <https://dx.doi.org/10.17504/protocols.io.bchhit36>  
545
- 546 19. Guppy (2021). Guppy basecaller (Version 3.1) [www.nanoporetech.com](http://www.nanoporetech.com).  
547
- 548 20. Koren S, Walenz BP, Berlin K, Miller JR, Bergman NH, Phillippy AM. Canu: scalable and  
549 accurate long-read assembly via adaptive *k*-mer weighting and repeat separation. *Genome*  
550 *Res.* 2017;27:722-36.  
551

- 552 21. Heaton MP, Smith TPL, Bickhart DM, Vander Ley BL, Kuehn LA, Oppenheimer J, Shafer  
553 WR, Schuetze FT, Stroud B, McClure JC, Barfield JP, Blackburn HD, Kalbfleisch TS,  
554 Davenport KM, Kuhn KL, Green RE, Shapiro B, Rosen BD. A Reference Genome Assembly  
555 of Simmental Cattle, *Bos taurus taurus*. *J Hered.* 2021;112:184-91.  
556
- 557 22. Oppenheimer J, Rosen BD, Heaton MP, Vander Ley BL, Shafer WR, Schuetze FT, Stroud B,  
558 Kuehn LA, McClure JC, Barfield JP, Blackburn HD, Kalbfleisch TS, Bickhart DM,  
559 Davenport KM, Kuhn KL, Green RE, Shapiro B, Smith TPL. A Reference Genome  
560 Assembly of American Bison, *Bison bison bison*. *J Hered.* 2021;112:174-183.  
561
- 562 23. Arima Genomics Mapping Pipeline (2019). ArimaGenomics  
563 [https://github.com/ArimaGenomics/mapping\\_pipeline](https://github.com/ArimaGenomics/mapping_pipeline).  
564
- 565 24. Li H, Handsaker B, Wysoker A, Fennell T, Ruan J, Homer N, Marth G, Abecasis G, Durbin  
566 R; 1000 Genome Project Data Processing Subgroup. The Sequence Alignment/Map format  
567 and SAMtools. *Bioinformatics.* 2009;25:2078-9.  
568
- 569 25. PicardTools (2019). Picard Toolkit, Broad Institute (Version 2.9.2)  
570 <http://broadinstitute.github.io/picard>.  
571
- 572 26. Quinlan AR. BEDTools: The Swiss-Army Tool for Genome Feature Analysis.  
573 *Bioinformatics.* 2014;47:1-34.  
574

- 575 27. Ghurye J, Pop M, Koren S, Bickhart D, Chin CS. Scaffolding of long read assemblies using  
576 long range contact information. *BMC Genomics*. 2017;18:527.  
577
- 578 28. Yardımcı GG, Noble W. Software tools for visualizing Hi-C data. *Genome Biol*. 2017;18:26.  
579
- 580 29. Heng L. Minimap2: pairwise alignment for nucleotide sequences. *Bioinformatics*.  
581 2018;34:3094-100.  
582
- 583 30. D-Genies (2018). D-Genies (Version 1.2.0) [https://github.com/genotoul-](https://github.com/genotoul-bioinfo/dgenies/releases/tag/v1.2.0)  
584 [bioinfo/dgenies/releases/tag/v1.2.0](https://github.com/genotoul-bioinfo/dgenies/releases/tag/v1.2.0).  
585
- 586 31. CombineFasta agp2fasta (2020). CombineFasta (Version 0.0.17)  
587 <https://github.com/njdbickhart/CombineFasta>.  
588
- 589 32. Loman N, Quick J Simpson J. A complete bacterial genome assembled de novo using only  
590 nanopore sequencing data. *Nat Methods*. 2015;12:733-735.  
591
- 592 33. NanoGrid (2018). NanoGrid <https://github.com/skoren/NanoGrid>.  
593
- 594 34. Guan D, McCarthy SA, Wood J, Howe K, Wang Y, Durbin R. Identifying and removing  
595 haplotypic duplication in primary genome assemblies. *Bioinformatics*. 2020;36:2896-8.  
596

- 597 35. Smit AFA, Hubley R, Green P. RepeatMasker Open-4.0. 2013-2015.  
598 <https://www.repeatmasker.org>.  
599
- 600 36. Garrison E, Marth G. Haplotype-based variant detection from short-read sequencing. arXiv  
601 preprint. 2012:1207.3907.  
602
- 603 37. Merfin (2021). Merfin <https://github.com/arangrhie/merfin>.  
604
- 605 38. Trim Galore (2020). TrimGalore (Version 0.6.6)  
606 [https://www.bioinformatics.babraham.ac.uk/projects/trim\\_galore/](https://www.bioinformatics.babraham.ac.uk/projects/trim_galore/).  
607
- 608 39. Dobin A, Davis CA, Schlesinger F, Drenkow J, Zaleski C, Jha S, Batut P, Chaisson M, &  
609 Gingeras TR. STAR: ultrafast universal RNA-seq aligner. *Bioinformatics*. 2013;29:15-21.  
610
- 611 40. Li H. A statistical framework for SNP calling, mutation discovery, association mapping and  
612 population genetical parameter estimation from sequencing data. *Bioinformatics*.  
613 2011;27:2987-93.  
614
- 615 41. Oves aries Annotation Release 104. NCBI. 2021.  
616 [https://ftp.ncbi.nlm.nih.gov/genomes/all/annotation\\_releases/9940/104](https://ftp.ncbi.nlm.nih.gov/genomes/all/annotation_releases/9940/104)  
617
- 618 42. Shumate, A., and Salzberg, S.L. (2020). Liftoff: accurate mapping of gene annotations.  
619 *Bioinformatics*. Doi:10.1093/bioinformatics/btaa1016.  
620

- 621 43. Bray, N. L., Pimentel, H., Melsted, P., and Pachter, L. (2016). Near-optimal probabilistic  
622 RNA-seq quantification. *Nat. Biotechnol.* 34, 525–527. doi:10.1038/nbt.3519.  
623
- 624 44. Quinlan, A. R., and Hall, I. M. (2010). BEDTools: A flexible suite of utilities for comparing  
625 genomic features. *Bioinformatics* 26, 841–842. doi:10.1093/bioinformatics/btq033.  
626
- 627 45. Themis-ASM (2020). Themis-ASM pipeline <https://github.com/njdbickhart/Themis-ASM>.  
628
- 629 46. Manni, M, Berkeley, M.R., Seppey, M., Simão, F.A., Zdobnov, E.M., BUSCO Update:  
630 Novel and Streamlined Workflows along with Broader and Deeper Phylogenetic Coverage  
631 for Scoring of Eukaryotic, Prokaryotic, and Viral Genomes, *Molecular Biology and*  
632 *Evolution*, 2021;38:4647–54, <https://doi.org/10.1093/molbev/msab199>  
633
- 634 47. Vezzi, F., Narzisi, G., Mishra, B. Reevaluating Assembly Evaluations with Feature Response  
635 Curves: GAGE and Assemblathons. *PLoS ONE*. 2012;7:e52210.  
636
- 637 48. Rhie A, Walenz BP, Koren S, Phillippy AM. Merqury: reference-free quality, completeness,  
638 and phasing assessment for genome assemblies. *Genome Biol.* 2020;21:245.  
639
- 640 49. Koren S, Rhie A, Walenz BP, Dilthey AT, Bickhart DM, Kingan SB, Hiendleder S, Williams  
641 JL, Smith TPL, Phillippy AM. De novo assembly of haplotype-resolved genomes with trio  
642 binning. *Nat Biotechnol.* 2018;10.1038/nbt.4277.  
643

644 50. Davenport KM; Bickhart DM; Worley KC; Murali SC; Salavati M; Clark EL; Cockett NE;  
 645 Heaton MP; Smith TPL; Murdoch BM; Rosen BD (2021): Supporting data for "An improved  
 646 ovine reference genome assembly to facilitate in depth functional annotation of the sheep  
 647 genome" GigaScience Database. <http://doi.org/10.5524/100944>

648

649 **Tables**

650

651 Table 1: Assembly quality statistics comparison

| Assembly Statistic                    | ARS-UI_Ramb_v2.0 | Oar_rambouillet_v1.0 | Oar_v4.0      | Description                                                                                                                             |
|---------------------------------------|------------------|----------------------|---------------|-----------------------------------------------------------------------------------------------------------------------------------------|
| <b>Total Length (Mb)</b>              | 2628.15          | 2869.91              | 2615.52       | Assembly length in Mbp                                                                                                                  |
| <b>Contig Number</b>                  | 226              | 7,486                | 48,482        | Total number of contigs                                                                                                                 |
| <b>Contig N50 (bp)</b>                | 43,178,051       | 2,572,683            | 150,472       | Half the length of the assembly is in contigs of this size or greater                                                                   |
| <b>Contig L50 (number of contigs)</b> | 24               | 313                  | 5,008         | The smallest number of contigs whose length sum make up half of the assembly size                                                       |
| <b>Scaffold Number</b>                | 142              | 2,641                | 5,466         | Total number of scaffolds and unplaced contigs in the assembly                                                                          |
| <b>merQV</b>                          | 44.7721*         | 32.1705*             | 31.9131**     | Kmer based quality from Merqury, which estimates the frequency of consensus errors in the assembly [48]                                 |
| <b>merErrorRate</b>                   | 0.000033327*     | 0.00060662*          | 0.000643714** | Kmer based error rate from Merqury, which estimates error rate of the assembly based on errors in kmers [48]                            |
| <b>merCompleteness</b>                | 93.0479*         | 93.4711*             | 92.2182**     | Proportion of complete assembly estimated by Merqury based on "reliable" kmers, or kmers unlikely to be caused by sequencing error [48] |
| <b>baseQV</b>                         | 41.84*           | 40.69*               | 32.40**       | SNP and INDEL quality value estimated from short read data mapped to the assembly [49]                                                  |
| <b>Unmap%</b>                         | 0.96*            | 1.00*                | 0.73**        | Percentage of short reads that are unmapped to each assembly [49]                                                                       |
| <b>COMPLETESC</b>                     | 93.9             | 93.0                 | 91.2          | Percent of complete, single copy BUSCOs                                                                                                 |
| <b>COMPLETEDUP</b>                    | 2.1              | 2.6                  | 1.6           | Percent of complete, duplicated BUSCOs                                                                                                  |
| <b>FRAGMENT</b>                       | 0.9              | 1.1                  | 2.4           | Percent of fragmented BUSCOs                                                                                                            |
| <b>MISSING</b>                        | 3.1              | 3.3                  | 4.8           | Percent of missing BUSCOs                                                                                                               |

652

653 \*Short read sequencing from the Rambouillet ewe used to assemble both ARS-UI\_Ramb\_v2.0  
 654 and Oar\_rambouillet\_v1.0 was used in these quality values.

| Tissue                  | Genome* | # input reads | # reads uniquely mapped | % of reads uniquely mapped | # reads multi-mapped | % reads multi-mapped | # reads unmapped | % reads unmapped | # indels |
|-------------------------|---------|---------------|-------------------------|----------------------------|----------------------|----------------------|------------------|------------------|----------|
| Skin                    | v2.0    | 62,630,134    | 53,990,480              | 86.20%                     | 6,684,213            | 10.67%               | 1,955,441        | 3.12%            | 962      |
|                         | v1.0    |               | 52,523,732              | 83.86%                     | 8,114,599            | 12.96%               | 1,991,803        | 3.18%            | 2,512    |
|                         | Δ       | N/A           | 1,466,748               | 2.34%                      | -1,430,386           | -2.29%               | -36,362          | -0.06%           | -1,550   |
| Thalamus                | v2.0    | 54,655,873    | 45,721,452              | 83.65%                     | 5,414,620            | 9.91%                | 3,519,801        | 6.44%            | 649      |
|                         | v1.0    |               | 44,904,096              | 82.16%                     | 6,126,363            | 11.21%               | 3,625,414        | 6.63%            | 1,054    |
|                         | Δ       | N/A           | 817,356                 | 1.49%                      | -711,743             | -1.30%               | -105,613         | -0.19%           | -405     |
| Pituitary               | v2.0    | 43,368,663    | 39,710,031              | 91.56%                     | 2,405,103            | 5.55%                | 1,253,529        | 2.89%            | 604      |
|                         | v1.0    |               | 34,115,417              | 78.66%                     | 7,866,251            | 18.14%               | 1,386,995        | 3.20%            | 960      |
|                         | Δ       | N/A           | 5,594,614               | 12.90%                     | -5,461,148           | -12.59%              | -133,466         | -0.31%           | -356     |
| Lymph node – mesenteric | v2.0    | 43,673,576    | 38,819,419              | 88.88%                     | 3,562,121            | 8.16%                | 1,292,036        | 2.96%            | 684      |
|                         | v1.0    |               | 38,296,065              | 87.69%                     | 4,057,915            | 9.29%                | 1,319,596        | 3.02%            | 999      |
|                         | Δ       | N/A           | 523,354                 | 1.19%                      | -495,794             | -1.13%               | -27,560          | -0.06%           | -315     |
| Abomasum pylorus        | v2.0    | 45,977,534    | 41,018,529              | 89.21%                     | 2,978,042            | 6.48%                | 1,980,963        | 4.31%            | 512      |
|                         | v1.0    |               | 40,403,981              | 87.88%                     | 3,533,015            | 7.68%                | 2,040,538        | 4.44%            | 846      |
|                         | Δ       | N/A           | 614,548                 | 1.33%                      | -554,973             | -1.20%               | -59,575          | -0.13%           | -334     |

655 \*\*Short read sequencing from the Texel animal used to assemble Oar\_v4.0 was used in these  
 656 quality values.

657

658

659 Table 2: RNA-seq alignment statistics to ARS-UI\_Ramb\_v2.0 and Oar\_rambouillet\_v1.0 from  
 660 five different tissues.

661



662 \* Genomes include v2.0 (ARS-UI\_Ramb\_v2.0) and v1.0 (Oar\_rambouillet\_v1.0) and the  
663 difference ( $\Delta$ ).

664

665

666

667

668

### 669 **Figure Legends**

670

671 Figure 1: Image of Benz 2616 Rambouillet ewe selected for the ovine reference genome  
672 assembly.

673

674 Figure 2: Hi-C contact map comparison of ARS-UI\_Ramb\_v2.0 A) directly after scaffolding and  
675 before manual curation and B) after manual curation with scaffold rearrangements and joins.

676

677 Figure 3: Assembly error comparison between ARS-UI\_Ramb\_v2.0, Oar\_rambouillet\_v1.0, and  
678 Oar\_v4.0 in A) a feature response curve displaying sorted lengths of the assemblies with the  
679 fewest errors and B) specific feature counts for each genome and descriptions.

680

681 Figure 4: Dotplot comparison of genome assemblies between A) ARS-UI\_Ramb\_v2.0 and  
682 Oar\_rambouillet\_v1.0, and B) ARS-UI\_Ramb\_v2.0 and Oar\_v4.0.

683

684 Figure 5: Kallisto comparison of the number of expressed transcripts for the RNA-Seq dataset of  
685 61 tissue samples from Benz2616, across the three annotations (Oar\_Rambouillet\_v1.0,  
686 Ramb1LO2 (liftover) and ARS-UI\_Ramb\_v2.0).

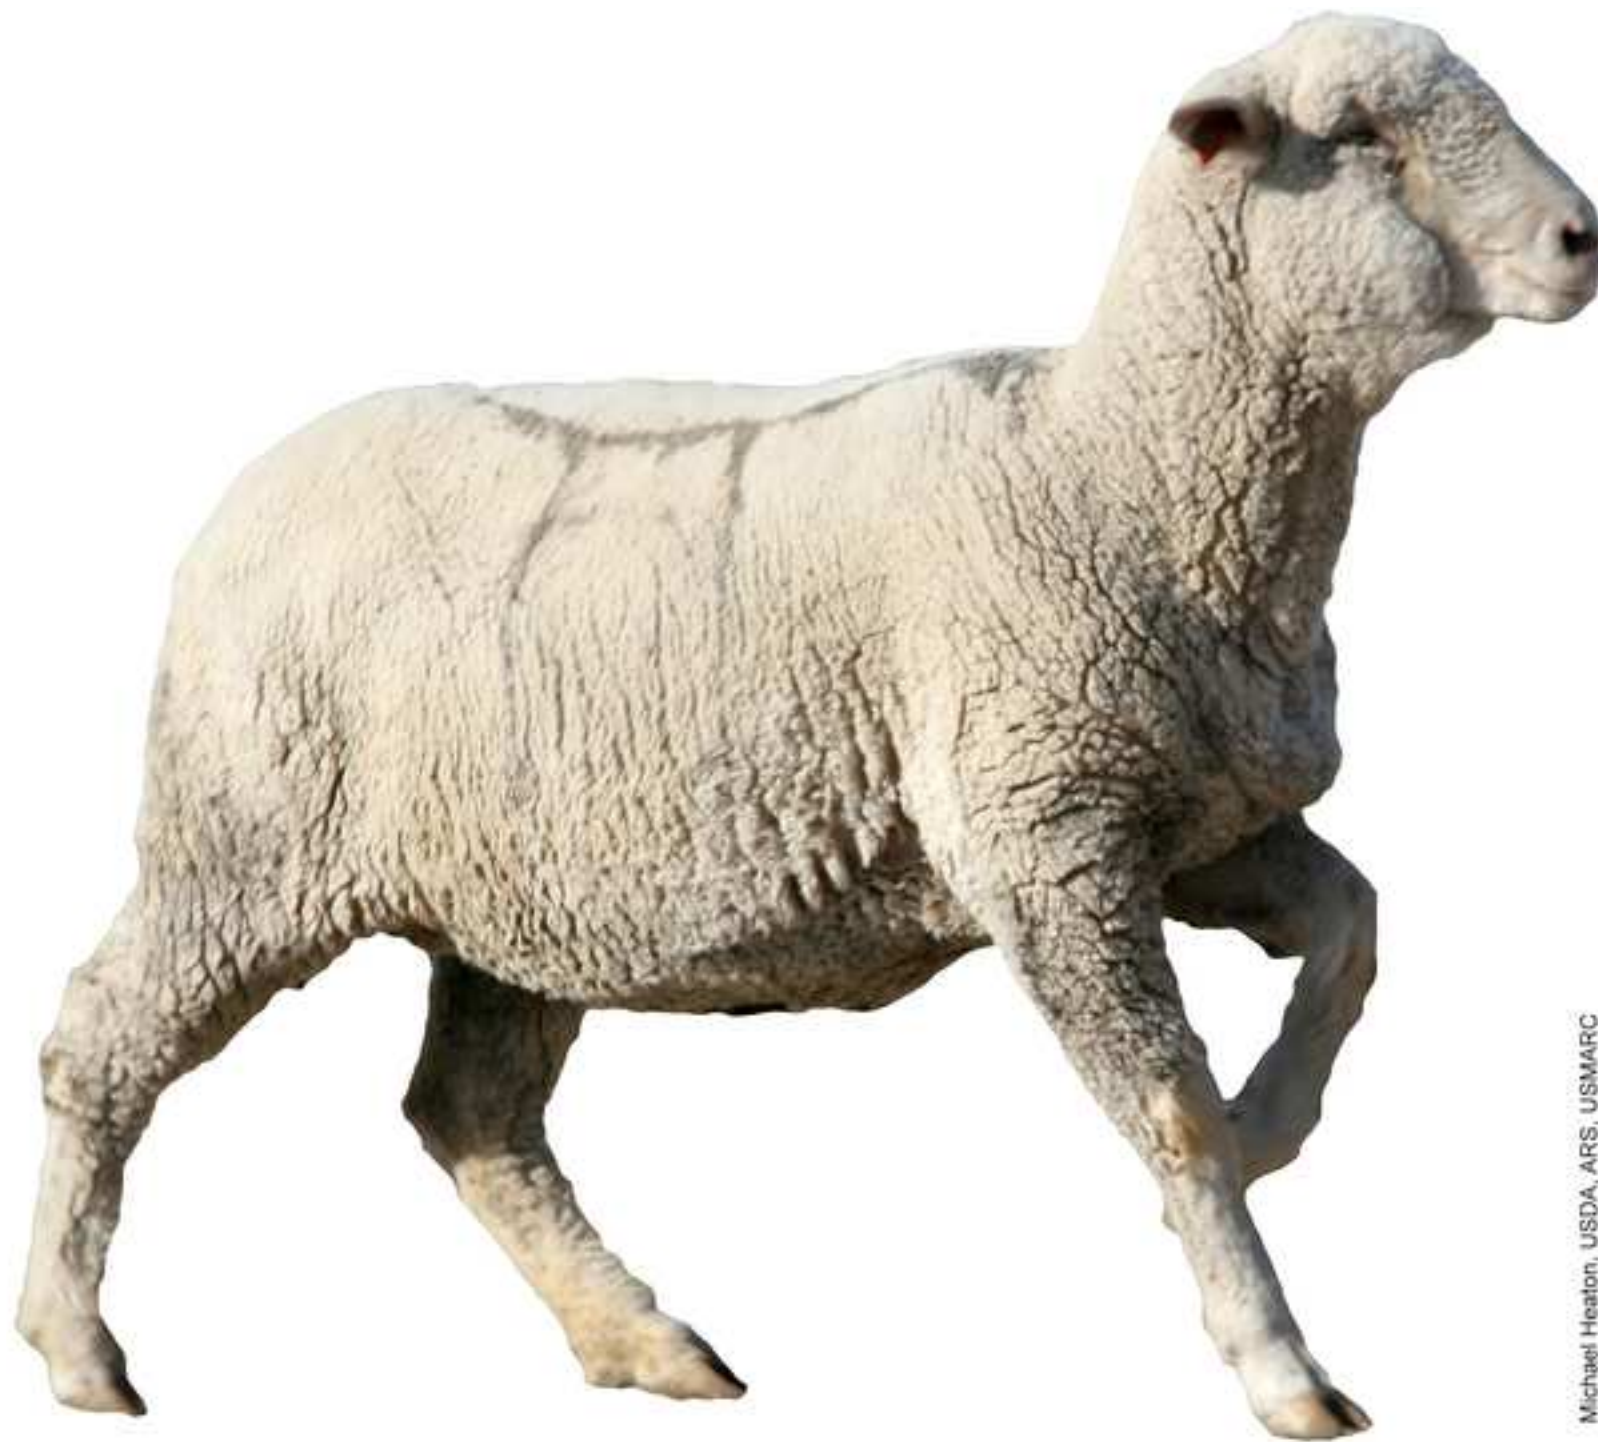

Michael Heaton, USDA, ARS, USMARC

**A**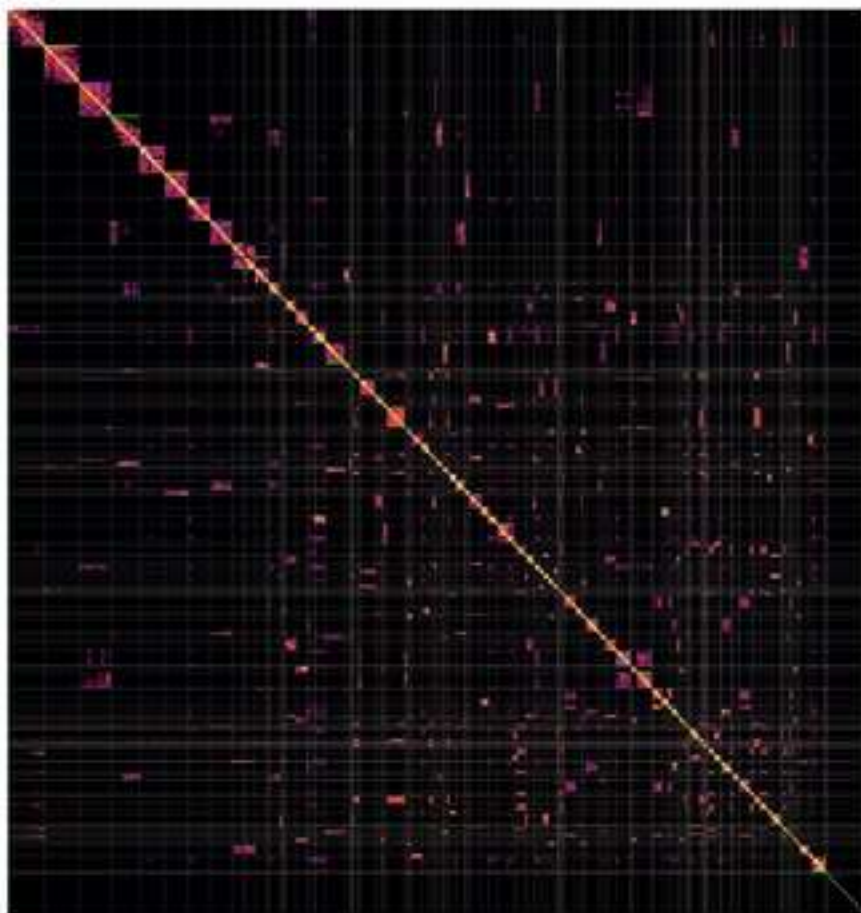**B**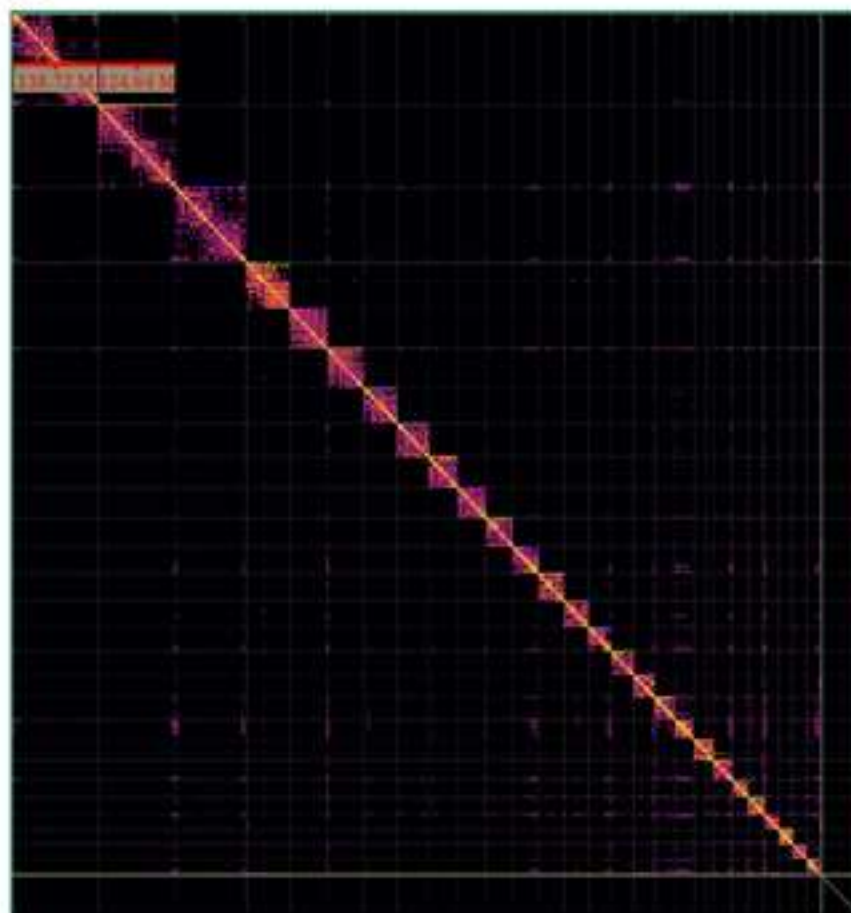

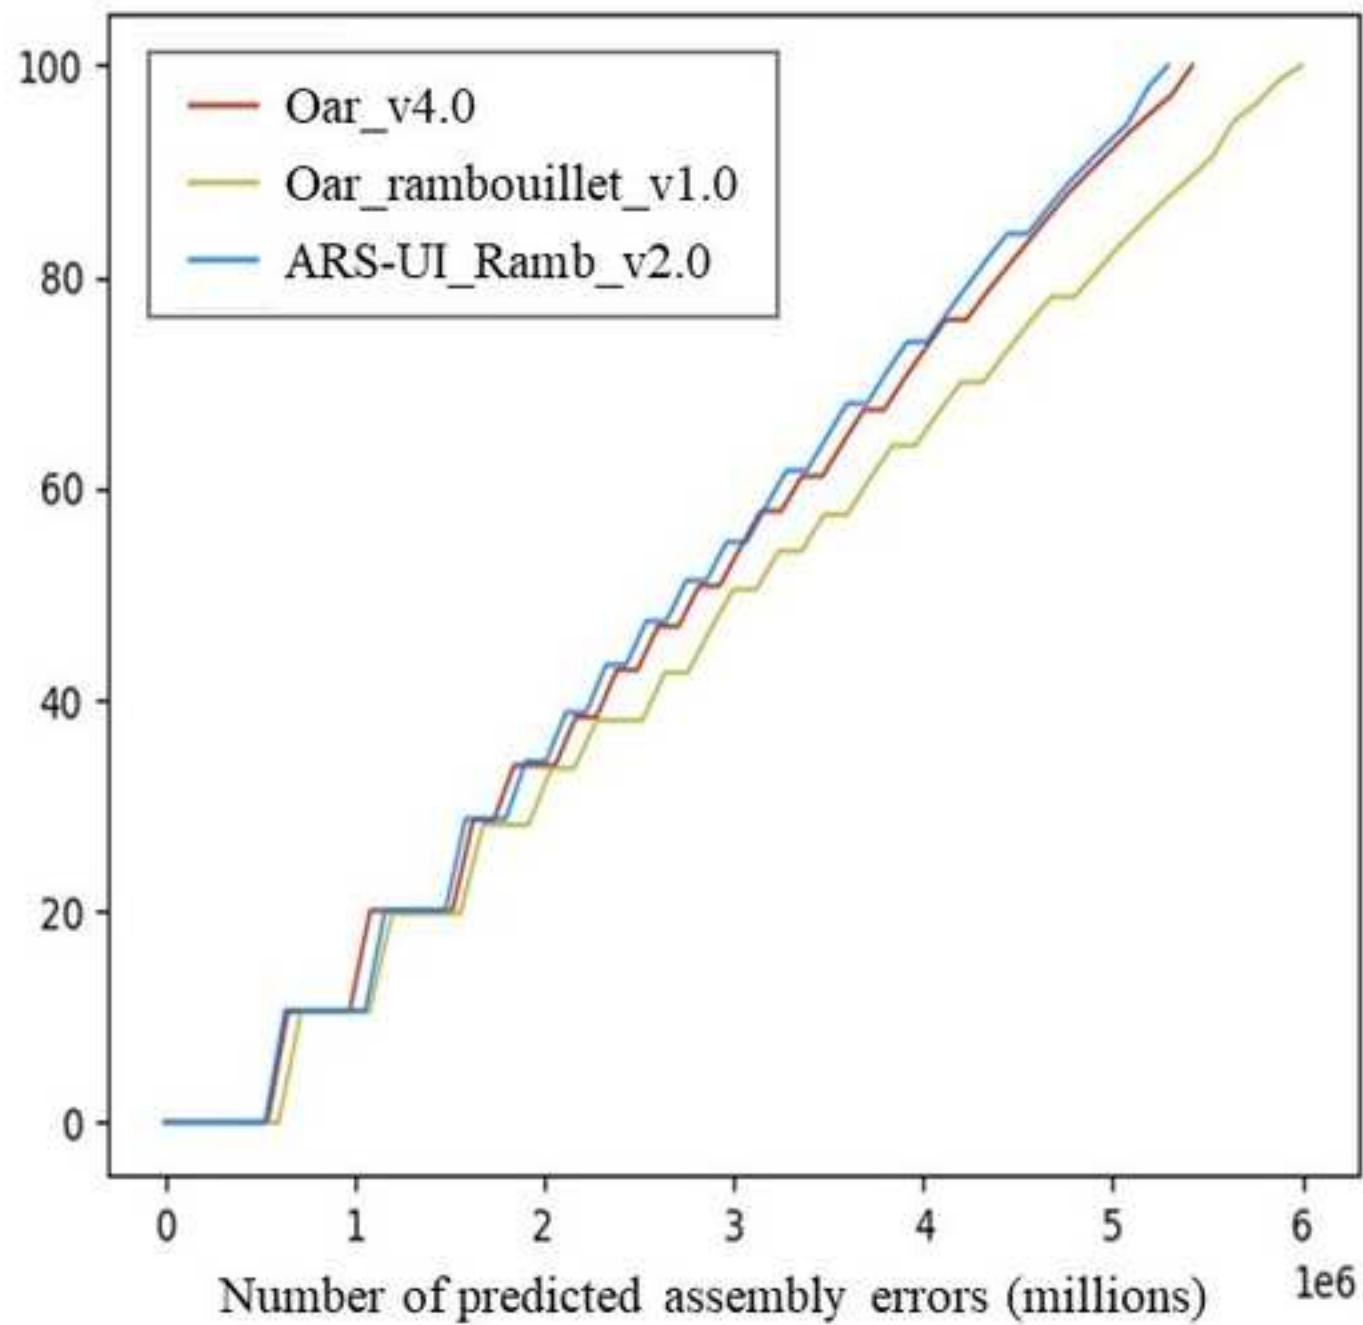

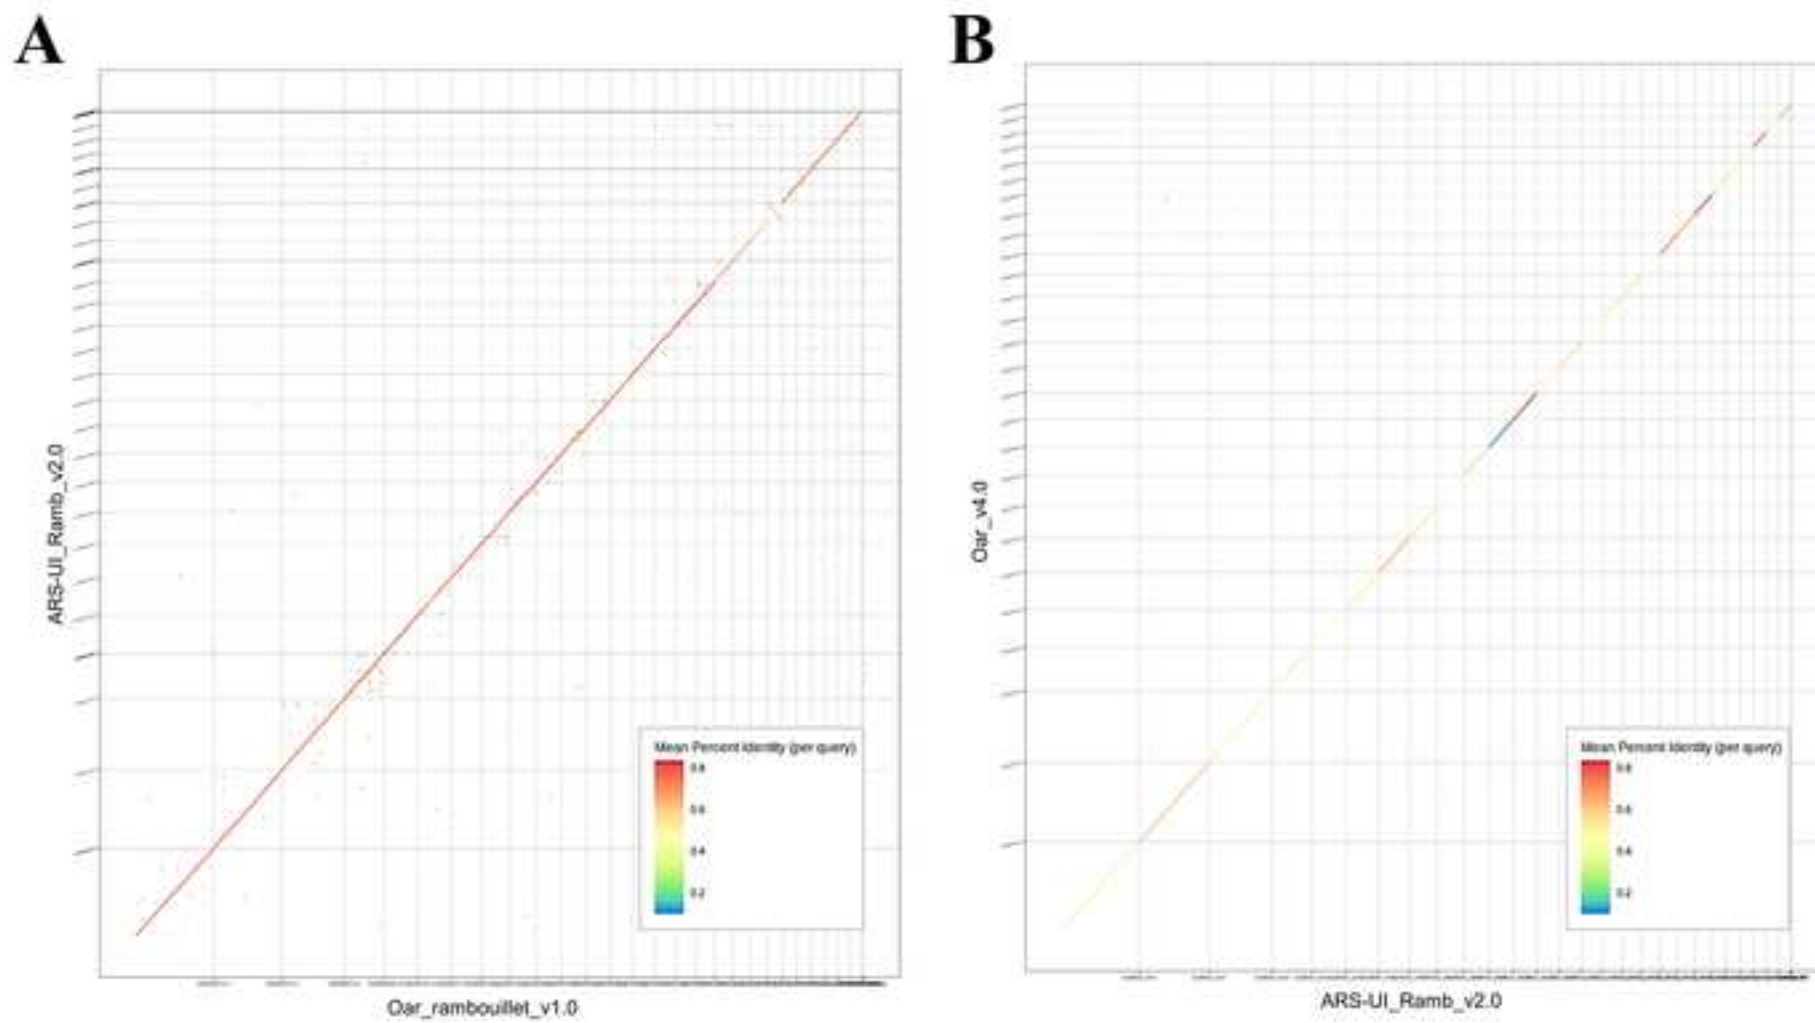

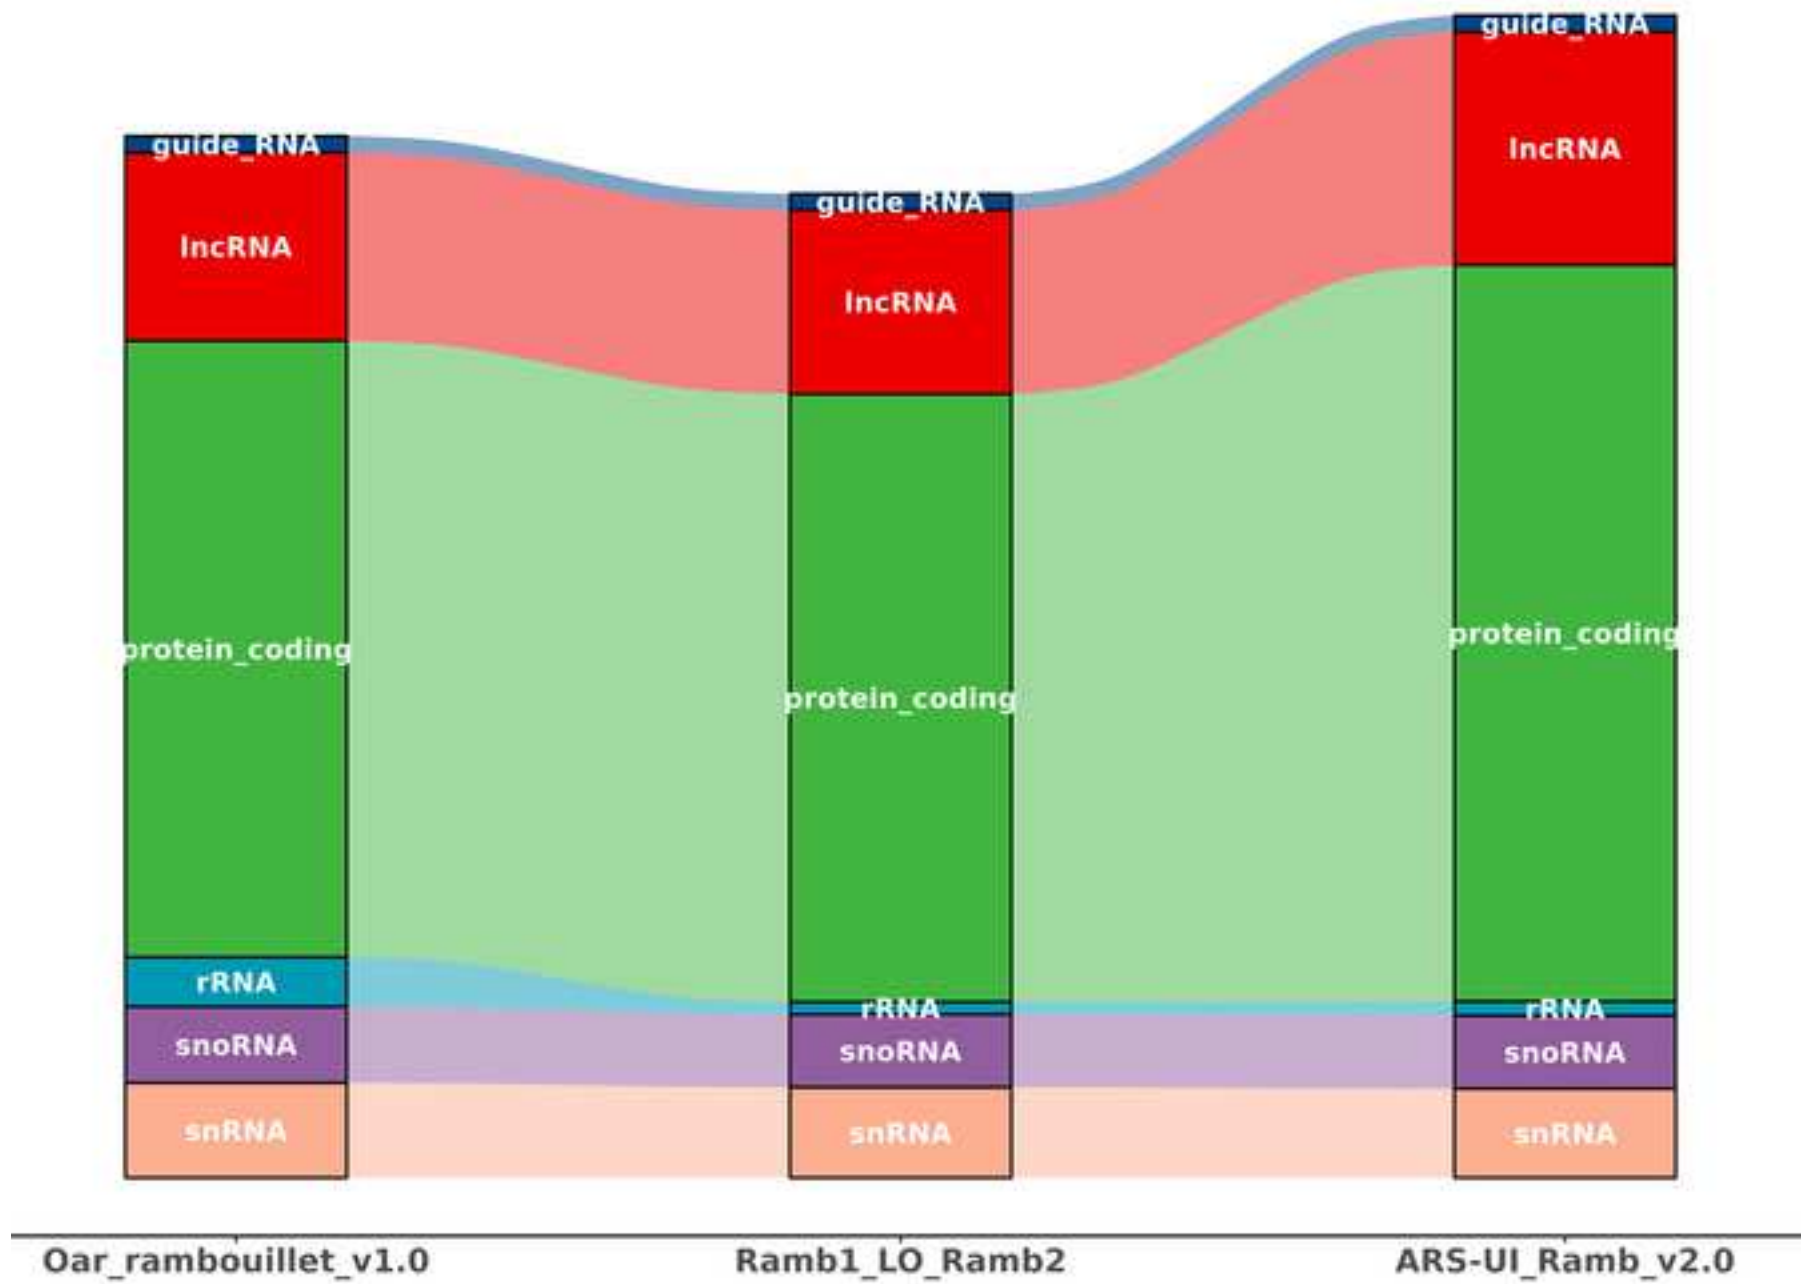

Supplement: giab096_giga-d-21-00165_revision_2.pdf [file giab096_giga-d-21-00165_revision_2.pdf]
